# Supplementary material for: Crossability of Triticum urartu and Triticum monococcum Wheats, Homoeologous Recombination, and Description of a Panel of Interspecific Introgression Lines
Source: PubMed Central journal article supplement (PMC4199699; doi:10.1534/g3.114.013623), 2014-08-21
Supplement: supp_g3.114.013623_013623SI.pdf [file supp_g3.114.013623_013623SI.pdf]

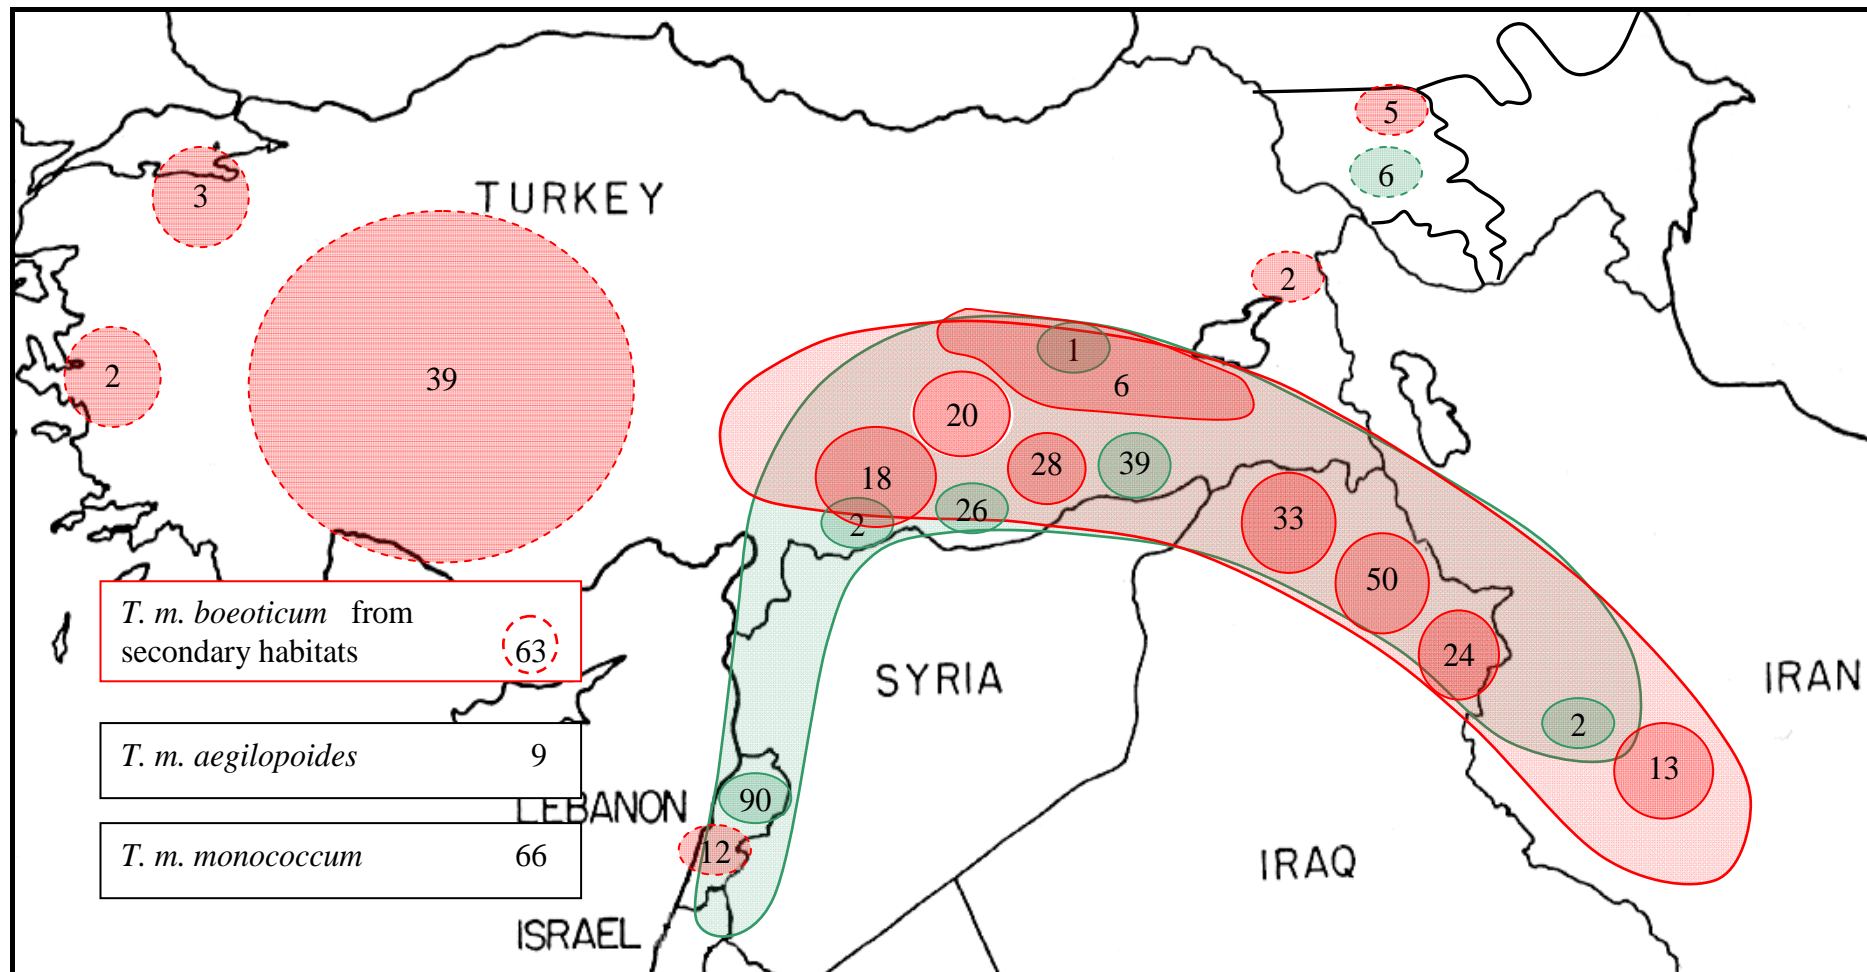

**Figure S1** Geographic distribution and number of AFLP-fingerprinted *Triticum monococcum* ssp. *boeoticum* (red circles) and *Triticum urartu* (green circles) accessions. The red- and the green-delimited areas correspond to the primary habitats of *T. m.* subsp. *boeoticum* (Heun et al., 1997) and of *T. urartu* (see Valkoun et al., 1998), respectively. The number of *T. m.* ssp. *boeoticum* from secondary habitats, as well as ssp. *monococcum* and ssp. *aegilopoides* accessions, is also reported.

*Triticum urartu*

- Turkey
- Lebanon
- USSR/Armenia

**PCoordA**

(Principal Coordinates Analysis)

158 individuals

248 polymorphic AFLP markers

genetic distance: Jaccard

1. axis: 22,8%

2. axis: 10,5%

3. axis: 5,9%

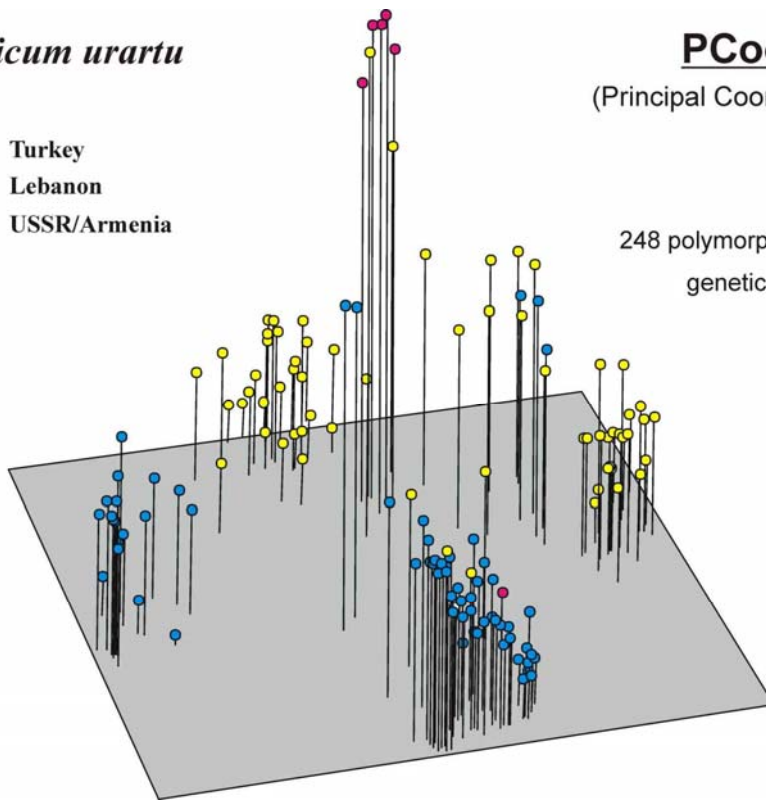

**Figure S2** Principal Coordinates Analysis of the *T. urartu* wheat accessions. In this analysis, the lines molecularly intermediate between *T. urartu* and *T. monococcum* have not been considered.

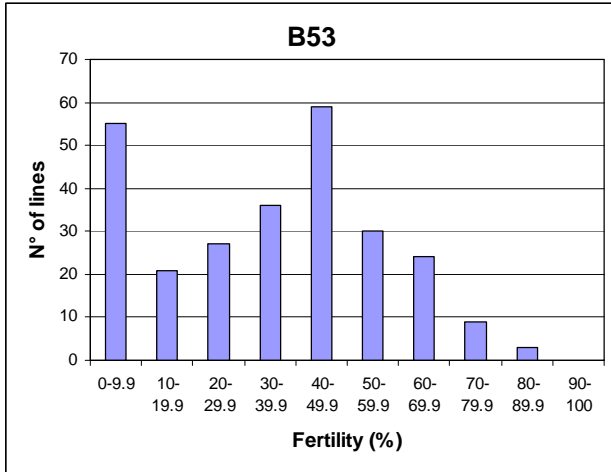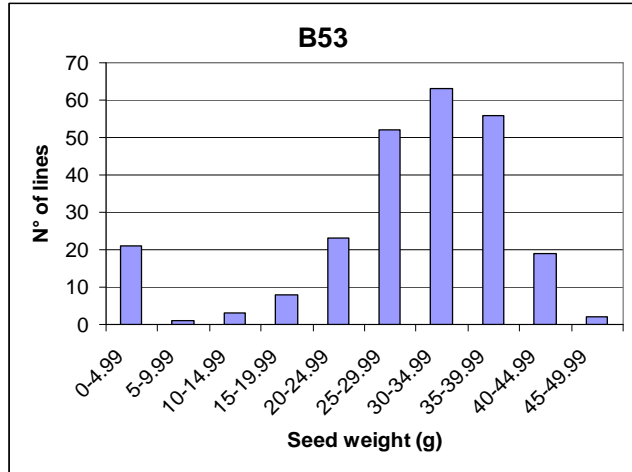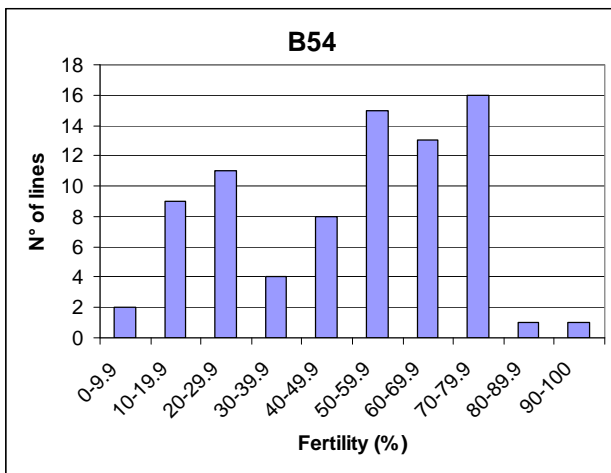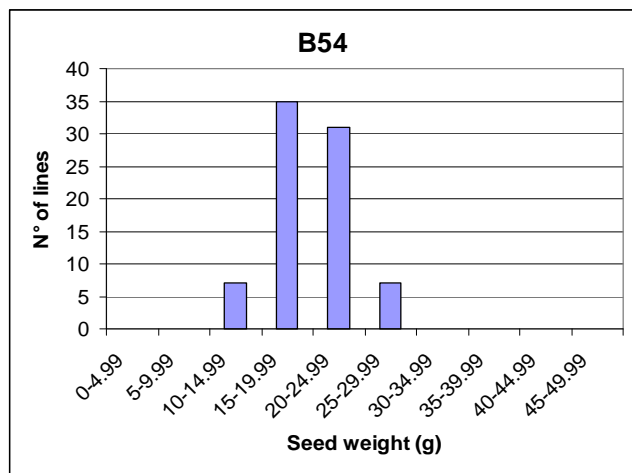

**Figure S3** Fertility (%) and 1000 seeds weight (g) distribution in the B53 (n= 268) and B54 (n= 80) populations

**Files S1-S3**

Available for download as Excel files at <http://www.g3journal.org/lookup/suppl/doi:10.1534/g3.114.013623/-/DC1>

**File S1** Mapping data of the diploid wheat lines

**File S2** Mapping data of the B53 recombinant population

**File S3** Mapping data of the B54 recombinant population

**Table S1 Diploid wheat accessions considered for AFLP fingerprinting.**

Available for download as an Excel file at <http://www.g3journal.org/lookup/suppl/doi:10.1534/g3.114.013623/-/DC1>

**Table S2 Sequences of probes used for amplifying GPW microsatellites.**

| SSR      | Sequence primer Forward (5'—3') | Sequence primer reverse (5'—3') |
|----------|---------------------------------|---------------------------------|
| gpw_2006 | ATGAGAAGGGGGTCAGGATT            | ACATGTTCAGCCCAGGAGAC            |
| gpw_2010 | ACCCATTGCCTTTCTTTTT             | TCTGTTGATGATCCGTCCAA            |
| gpw_2018 | ATGTAGGCAGAGCACACACG            | AGTCGATGAAAGGCAGCATC            |
| gpw_2029 | TAAAGCTAAACACGACGGGG            | CACCGCGAACGAATTAAC              |
| gpw_2032 | CCTGGAAGAATAGACGTGCC            | CAAGATGGGGCAGAAGATGT            |
| gpw_2069 | AGGAGAAGGCGTAAGAACCC            | GGCAAGCTGGTCTGTGTAT             |
| gpw_2080 | ATCGCATGTAACTGCACAA             | CCTTTAATCGATTGCTCGGA            |
| gpw_2098 | ACACACCCGCAAAATAATCT            | TGACGCCACATAGGTCAATC            |
| gpw_2109 | TATATTGTCACGGGGCTTC             | TGGTGGAGAGTCTGCACTG             |
| gpw_2111 | AAATTTTTGTCTGCCGCTT             | CTTGTCGTTGAGAGTTGGA             |
| gpw_2115 | TTACAAGGCGTAAATTGCC             | TGCTTGCTGACCACTGAATC            |
| gpw_2117 | TGGCCTGAAATCTTAGCCTG            | CAAGAATGCGATAAGATGGGA           |
| gpw_2125 | GGATGGGAAATGTTGGATG             | AAAATCAAACGGCAACTTGG            |
| gpw_2127 | GACAACACCGATCCGTAC              | TGTCCATGCGTTCTATTCCA            |
| gpw_2132 | TCCCAGAAATATGTGGCTAT            | TATGTTGCATTGTGGTGGCT            |
| gpw_2138 | ATAGGAGGACTCCTGGGCTC            | TTGCCTCAACTAGATCGCCT            |
| gpw_2139 | TGTTAACCCAGTTTCTTATGC           | ACACTGATGCATCCCACAAA            |
| gpw_2140 | GTCCACGTGCTAGGGAGGTA            | ACATGCCCTAAGCTGCCCA             |
| gpw_2142 | ACAACCTGCTGACGCTCCTTC           | GATTAATTAAGCCAGGGACCG           |
| gpw_2160 | ATTTACGGCTCGACCACTCA            | ACTGGAAGGGGGCGCAAGC             |
| gpw_2166 | GCCCCTGACATATTACTGT             | AACTGGATGGTTGCATTCC             |
| gpw_2169 | GCCAGGCCATCAGTAAATTC            | AATGGGCACAATTTGAGAGC            |
| gpw_2216 | ACGAGGAATTGCATCCTAGC            | CAAAGTAGAAATTTATGCGCGA          |
| gpw_2222 | TCTCAGGAGCTAGCAGCACA            | CTTCTGCCGATACATCCCAT            |
| gpw_2228 | TGTAGCTTCTGCATACCAAA            | CAAACCTTGCAGCTGCATTA            |
| gpw_2229 | CTGCGTGTCTCCTAATTT              | CTCCACCGTGTCTGGATAG             |
| gpw_2237 | CTTGCTTGCGGTAGGAGAC             | TGATCTATCAGGGTGAGCCC            |
| gpw_2239 | CAACCATATGCCAGGAGAC             | TGTTGCTGTCTGAAACAGGG            |
| gpw_2243 | GGGCAATCTGTTGGATCTGT            | CCACTTCGCTGCTGATGTAA            |
| gpw_2250 | AGCCATAGATGGCCCTACCT            | CACTCAATGGCAGGTCCTTT            |
| gpw_2253 | TGAGGAGAGGGGATATACGG            | TTTGGCAAATCTTATTGCC             |
| gpw_2258 | ATATAGGGCCGATGTGTGGA            | GGTCAGCAAAGTCAGCCTT             |
| gpw_2260 | CATCTCTACCCGATCCCTCA            | ACGCCGGTCTATTGAAAGTG            |
| gpw_2264 | TTGCTTTCCAAATTGTGCT             | GGCATTGAGAAATCCAAGCAT           |
| gpw_2266 | TTTTTGCCACACGGC                 | CGTGGAGGTGTCGACCTAAT            |
| gpw_2269 | CACATCAACAGTCTCTTCTA            | CTAGCTGGTGGTGGTCTTGG            |
| gpw_2270 | GAGGTCGTTGAAGGAAGG              | ATCGGACGGCCTGAGTTATA            |
| gpw_2275 | CTGCTGAACGTTGGAGGAT             | GGCCGTCTTTAGCTTTTGT             |
| gpw_2276 | ATAGGGTCTTCTGTGCC               | ACCCACAGTTGAAGTGGG              |
| gpw_2277 | TCAGAAGAGCGATGAGATAGAAA         | GCCATTTTAGGGCTCAGTG             |
| gpw_2281 | TCATCATGGTATGAGCGTGG            | ACAAGCATTCCAATTTGCC             |
| gpw_2283 | CTCTGTCAACGAGCTGGA              | AATGGGCTCAGATGCTCTG             |
| gpw_2297 | TCGGAGAACCAACTGATCC             | GACTAACCACTGGGAGTCGC            |
| gpw_2302 | GCTTCACATCATAGTGTGATAAGA        | AAGCACCTCCCATGCATATC            |
| gpw_2308 | GGAGGAACCGAATCCAGAGT            | GAGGCCGATCACATAAAGGA            |
| gpw_2311 | CCAAAAGTGGTGGATCAAT             | TGCAAGAACAGCTTACCGTC            |
| gpw_2323 | AGAAGTTGGCTCCGCTTTC             | AGTTGAAGATGGCCAGATG             |
| gpw_2328 | ATCCCAACAAACACTACCG             | TTGTCTCCATGACTATGTGGG           |
| gpw_2331 | GCGGGCTCAATATTGCTAGT            | GCATGGCTGAGGCTCAAGTA            |
| gpw_2335 | TTTGAGTTGCCACAAAAGT             | TGTTTTGTCTCACAGGCTGC            |

**Table S3 List of the introgression lines created in this study.** For each introgression line the left and right markers delimiting the chromosome segments of *T. urartu* are reported. The intervals where each chromosome segment is anchored in the linkage map of *T. monococcum* are also reported.

| Linkage Group | Left Marker | Right Marker | Interval (cM) | Zygoty | IL Name    |
|---------------|-------------|--------------|---------------|--------|------------|
| 4             | Xgpw2279    | Xcfa2173     | 3.59          | Hetero | 7197-16-9  |
| 4             | Xcfa2256    | Xgpw2138     | 4.08          | Hetero | 7197-16-8  |
| 3             | Xwmc150a    | Xbarc67      | 21.4          | Hetero | 7197-16-7  |
| 3             | Xgpw2132    | Xbarc218     | 6.5           | Hetero | 7197-16-6  |
| 2             | Xgwm515     | Xgwm1045     | 3.62          | Hetero | 7197-16-4  |
| 2             | Xgpw1162    | Xgpw2089     | 4.0           | Homo   | 7197-16-3  |
| 1             | Xgpw2005    | Xcfa2226     | 5.8           | Hetero | 7197-16-2  |
| 7             | Xwmc405     | Xcfa2174     | 18.94         | Hetero | 7197-16-12 |
| 7             | Xcfd31      | Xcfa2049     | 16.47         | Hetero | 7197-16-11 |
| 7             | Xcfd31      | Xcfa2049     | 16.47         | Hetero | 7197-16-10 |
| 1             | Xgpw2277    | Xcfa2158     | 10.93         | Hetero | 7197-16-1  |
| 7             | Xcfd31      | Xwmc479      | 5.19          | Homo   | 7189-8-8   |
| 1             | Xcfd58      | Xgpw2277     | 22.13         | Homo   | 7189-2-2   |
| 5             | Xcfa2086    | Xwmc74       | 14.46         | Homo   | 7189-10-6  |
| 1             | Xgwm1104    | Xgpw2277     | 5.38          | Homo   | 7189-10-4  |
| 5             | Xgwm443     | Xgwm154      | 15.63         | Homo   | 7189-10-3  |
| 5             | Xbarc124b   | Xcfa2141     | 5.32          | Homo   | 7189-10-3  |
| 7             | Xcfd6       | Xcfa2174     | 4.96          | Homo   | 7189-10-14 |
| 5             | Xgwm126     | Xwmc74       | 18.27         | Homo   | 7189-10-13 |
| 1             | Xcfd58      | Xgpw2181     | 9.07          | Homo   | 7189-10-12 |
| 1             | Xbarc9      | Xbarc9       | 16.12         | Homo   | 7189-10-12 |
| 5             | Xgpw2098    | Xcfa2163     | 155.33        | Homo   | 7189-10-12 |
| 5             | Xcfa2141    | Xwmc74       | 61.71         | Homo   | 7188-1-2   |
| 3             | Xcfa2134b   | Xcfa2134a    | 84.9          | Homo   | 7188-1-1   |
| 5             | Xcfd39      | Xwmc74       | 25.53         | Homo   | 7183-8-2   |
| 1             | Xcfd58      | Xgpw2181     | 9.07          | Homo   | 7183-5-1   |
| 1             | Xcfa2158    | Xgpw2005     | 1.1           | Homo   | 7183-5-1   |
| 5             | Xcfd2b      | Xgwm271      | 35.61         | Homo   | 7183-5-1   |
| 6             | Xcfd190     | Xwmc96a      | 2.88          | Homo   | 7183-3-1   |
| 3             | Xwmc147     | Xcfd79       | 53.9          | Homo   | 7183-2-2   |
| 4             | Xwmc89      | Xcfa2173     | 31.11         | Homo   | 7183-2-2   |
| 3             | Xcfa2134b   | Xcfa2134b    | 14.7          | Homo   | 7183-2-1   |
| 3             | Xcfa2134b   | Xcfa2134b    | 14.7          | Homo   | 7183-1-2   |
| 3             | Xwmc147     | Xwmc147      | 15.5          | Homo   | 7183-1-1   |
| 3             | Xcfa2134b   | Xcfa2134b    | 14.7          | Homo   | 7181-1-2   |
| 7             | Xwmc405     | Xwmc405      | 2.0           | Homo   | 7180-3-4   |
| 5             | Xgwm271     | Xcfa2141     | 28.91         | Homo   | 7179-3-3   |
| 5             | Xbarc124b   | Xcfa2141     | 5.32          | Homo   | 7179-3-2   |
| 5             | Xcfd39      | Xgwm126      | 7.26          | Homo   | 7179-1-4   |
| 1             | Xgwm33      | Xcfd58       | 1.74          | Homo   | 7178-6-1   |
| 2             | Xgwm726     | Xwmc177      | 20.74         | Homo   | 7178-6-1   |
| 2             | Xgwm726     | Xwmc177      | 20.74         | Homo   | 7178-4-1   |
| 2             | Xgpw2125    | Xbarc124a    | 5.48          | Homo   | 7178-3-1   |
|               | Xwmc264     | Xgwm372      | 21.98         | Homo   | 7178-3-1   |
| 1             | Xcfd58      | Xgpw2181     | 9.07          | Homo   | 7178-1-1   |

|   |           |           |       |        |           |
|---|-----------|-----------|-------|--------|-----------|
| 7 | Xcfd6     | Xcfa2174  | 4.96  | Homo   | 7178-1-1  |
| 2 | Xgpw2127  | Xwmc177   | 43.94 | Homo   | 7177-9-1  |
| 3 | Xcfa2134b | Xgwm493   | 21.7  | Homo   | 7177-16-6 |
| 2 | Xgwm515   | Xgwm1045  | 3.62  | Hetero | 7177-16-5 |
| 3 | Xcfd79    | Xwmc527   | 78.0  | Homo   | 7177-16-5 |
| 2 | Xgpw2125  | Xbarc124a | 5.48  | Homo   | 7177-16-4 |
| 2 | Xgwm275   | Xwmc474   | 2.56  | Homo   | 7177-16-4 |
| 2 | Xgpw2281  | Xgwm30    | 5.09  | Homo   | 7177-16-3 |
| 3 | Xcfd79    | Xwmc527   | 78.0  | Homo   | 7177-16-3 |
| 2 | Xgpw2125  | Xbarc124a | 5.48  | Homo   | 7177-16-1 |
| 2 | Xgwm275   | Xwmc474   | 2.56  | Homo   | 7177-16-1 |
| 2 | Xgpw2281  | Xgwm30    | 5.09  | Homo   | 7177-16-1 |
| 3 | Xcfa2134b | Xgwm493   | 21.7  | Homo   | 7177-16-1 |
| 3 | Xcfa2134a | Xgwm1121  | 3.1   | Homo   | 7177-16-1 |
| 2 | Xwmc474   | Xgwm515   | 3.82  | Homo   | 7177-15-3 |
| 2 | Xgpw2281  | Xgwm30    | 5.09  | Homo   | 7177-15-3 |
| 7 | Xwmc405   | Xwmc405   | 2.0   | Homo   | 7176-11-1 |
| 4 | Xwmc89    | Xcfd71    | 3.26  | Homo   | 7138-5-2  |

---



**Table S4 Supplementary information for Figure 2**

**B53**

- 1a: 7 bands homozygous mono (m404013, m355907, m366206, m376005, m326003, m364018, m376103)  
1b: 6 bands from urartu in 31.1cM (u413346, u413836, u4038e, u413848, u404028\*, u373829\*)  
1c: 3 bands from mono in 28.6 cM (m403255, m356001, m413851)  
1d: 6 bands homozygous mono (m356006, m356104, m363625, m403212d, m4133b, m423301)  
1e: 1 band from mono, 1 band from urartu in 6.4 cM (u364028, m423330); m and u bands in COUPLING  
1f: 4 bands from mono in 26.8 cM + 4 bands from urartu in 29.2 cM (m374026, m403251, u413343, m423229, m403215f, u403846, u424040, u403250); m and u bands in REPULSION  
2a: 10 bands homozygous mono (m363818, m374015, m356108, m413812b, m374019, m364009, m414014, m373807, m376109, m423321)  
3a: 1band homozygous mono (m403224)  
3b: cluster of 3 bands from mono in 10.8 cM (m404025, m373820, m424041)  
3c: cluster of 9 bands from urartu in 18.9 and 5 bands from mono in 11.8 cM (u413340, u404032, u403851, u413842, u414030, u373821, u413344, u363637, u363815, u373822, m403259, m374034, m413232, m414036, m404026)  
3d: 1 band from mono and cluster of 6 bands from urartu in 1.9 cM (m423314, u373337, u363642, u363635, u363636, u423846, u424045); m and u bands in REPULSION  
3e: 3 bands homozygous mono (m326101, m326112, m423319)  
4a: 6 bands homozygous mono (m404017, m374806, m4240a, m373316, m374010, m403225)  
4b: 3 bands in 12.3 cM, 2 from urartu, 1 from mono (u424013, u404003, m403208); m and u bands in COUPLING  
4c: 7 bands from mono in 18.7 cM (m423234, m413838, m373824, m373332, m374024, m413234, m413204)  
5a: 1 band homozygous mono (m403835)  
5b: 3 bands from mono in 12.5 cM + 2 bands from urartu in 4.6 cM (m364029, m424034, m404029, u404028\*, u373829\*)  
5c: 7 bands homozygous mono (m356113, m413815, m355902, m413328, m363819, m373211, m373304)  
5d: cluster of 12 bands from urartu in 10.4 cM + 4 bands from mono in 15.5 cM (u413837, u373342, u374032, u413342, u424037, u423844, u374027, u374028, u374031, u403262, u403843, u363633, m364030, m356109, m364024, m363632 )  
5e: 3 bands from mono in 8.9 cM + 3 bands from urartu in 12.4 cM ( m326008, m413833, m413846, u413839, u363643, u374029 )  
6a: 5 bands homozygous mono (m363805, m373208, m363812, m3733b, m403217)  
6b: 12 bands from mono in 63.2 cM + 4 bands from urartu in 20.7 cM (m424003, m373334, m366212, m364027, m364031, m326105, m374035, m423328, m404020, m403254, m413224, m414037, u423802, u424046, u374036, u414031)  
6c: 2 bands from mono in 21 cM (m326111, m413306)  
6d: 5 bands homozygous mono (m374808, m403818, m403831, m326006, m413814d)  
7a: 2 bands from mono in 8.2 cM (m423806, m403247)  
7b: 5 bands in from urartu in 37.9cM (u403841, u373828, u424039u413235, u364035)

**B54**

- 1a: 1 band from urartu and 2 bands from mono in 24 cM (m413819, m403836, m424030) IN REPULSION  
1b: 3 bands from mono in 22 cM (m364018, m363625, m4133b)  
1c: 1 band from urartu (m363629)  
2a: 1 band homozygous from mono (m374015)  
2b: 2 bands from urartu and 6 bands from mono in 50 cM (m374014, m364009, m403809, u3738b, u364001, m373807, m374003, m403821) IN REPULSION  
2c: 1 band homozygous from urartu (m413818)  
3a: 2 bands from urartu in 29 cM (m364001, m364004)  
3b: 1 band from mono (m3738a)  
3c: 2 bands from urartu in 9 cM (u413310, m4133a)  
3d: 5 bands from urartu in 43 cM (u413304, u414801, u413307, u373301, u374008)  
3e: 1 band from urartu (u413314)  
4a: 8 bands from mono in 35 cM (m404017, u364004, m4240a, m374010, u364007, m373316, m364012, m413334)  
4b: 1 band from mono (m374024)  
5a: 2 bands homozygous from mono in 38 cM (m403835, m424034)  
5b: 1 band from mono and 1 band from uraru in 17 cM (m4138c, m4038b) IN REPULSION  
5c: 1 band from mono (m373304)  
5d: 11 bands from urartu in 48 cM (u373806, u403808, u373809, u413801, u413805, u373302, u374004, u413303, m404006, u373813, u373802)  
5e: 1 band from mono (m413326)  
5f: 1 band homozygous from urartu (m413825)  
6a: 1 band from mono (m3738b)  
6b: 7 bands from mono in 44 cM (m4038c, u41339, u40389, m413820, m4038a, u363605, m413306)  
6c: 4 bands from mono in 52 cM (u40387, m414806, u373810, u364008)  
7a: 1 band homozygous from mono (m414810)  
7b: 3 bands from mono in 19 cM (m3740a, m423806, u37383)

\* Assigned to both 1b and 5b groups of B53 with a LOD > 3.0; preferentially assigned to group 1b with a LOD > 4.0
