# Supplementary material for: Crossability of Triticum urartu and Triticum monococcum Wheats, Homoeologous Recombination, and Description of a Panel of Interspecific Introgression Lines
Source: PubMed Central journal article supplement (PMC4199699; doi:10.1534/g3.114.013623), 2014-08-21
Supplement: supp_g3.114.013623_FigureS2.pdf [file supp_g3.114.013623_FigureS2.pdf]

*Triticum urartu*

- Turkey
- Lebanon
- USSR/Armenia

**PCoordA**

(Principal Coordinates Analysis)

158 individuals

248 polymorphic AFLP markers

genetic distance: Jaccard

1. axis: 22,8%

2. axis: 10,5%

3. axis: 5,9%

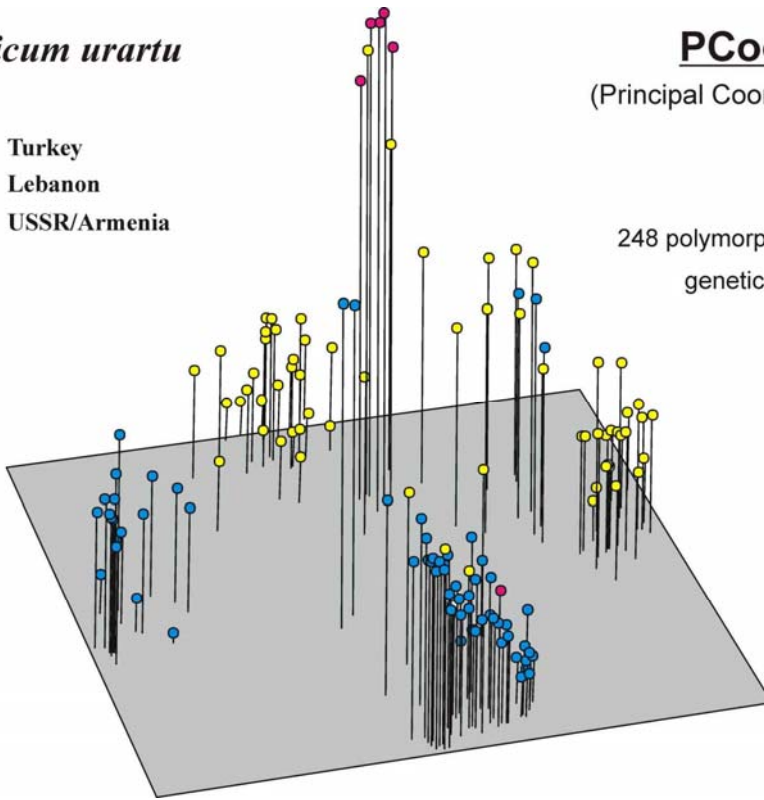

**Figure S2** Principal Coordinates Analysis of the *T. urartu* wheat accessions. In this analysis, the lines molecularly intermediate between *T. urartu* and *T. monococcum* have not been considered.
