# Supplementary material for: Crossability of Triticum urartu and Triticum monococcum Wheats, Homoeologous Recombination, and Description of a Panel of Interspecific Introgression Lines
Source: PubMed Central journal article supplement (PMC4199699; doi:10.1534/g3.114.013623), 2014-08-21
Supplement: supp_g3.114.013623_FigureS3.pdf [file supp_g3.114.013623_FigureS3.pdf]

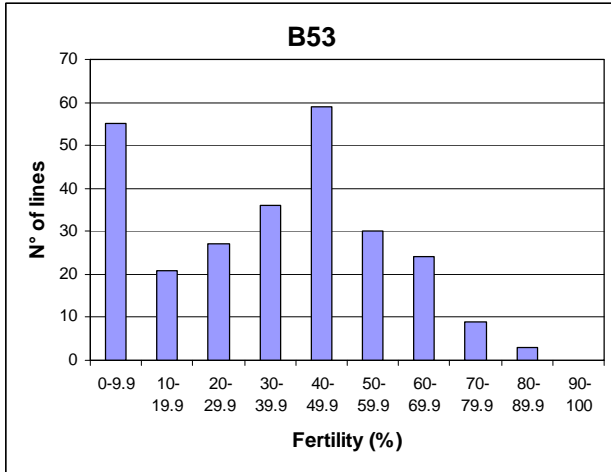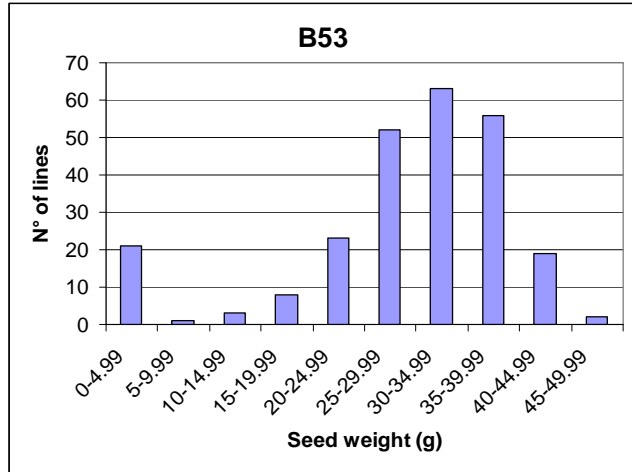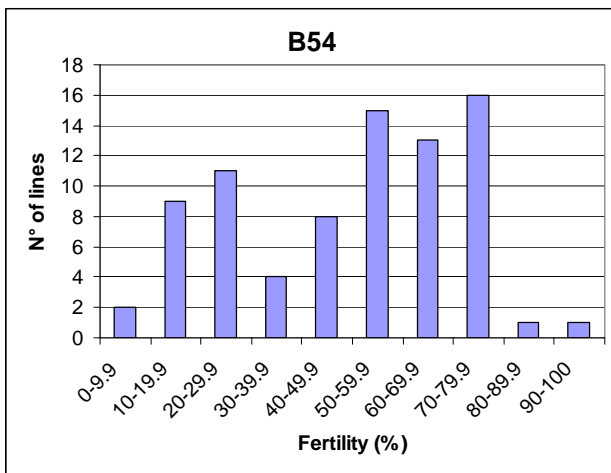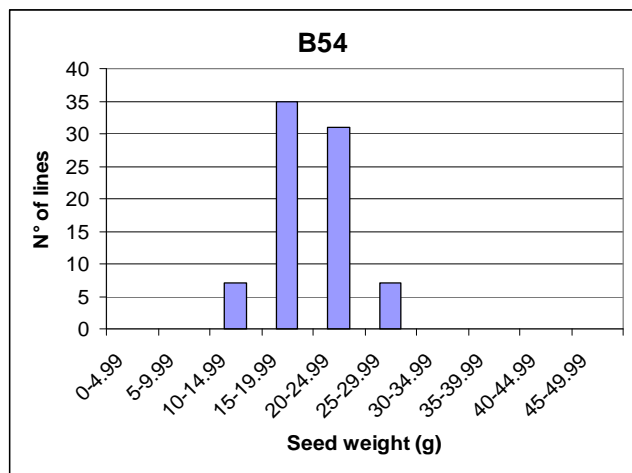

**Figure S3** Fertility (%) and 1000 seeds weight (g) distribution in the B53 (n= 268) and B54 (n= 80) populations
