# Supplementary material for: Crossability of Triticum urartu and Triticum monococcum Wheats, Homoeologous Recombination, and Description of a Panel of Interspecific Introgression Lines
Source: PubMed Central journal article supplement (PMC4199699; doi:10.1534/g3.114.013623), 2014-08-21
Supplement: supp_g3.114.013623_TableS2.pdf [file supp_g3.114.013623_TableS2.pdf]

**Table S2 Sequences of probes used for amplifying GPW microsatellites.**

| SSR      | Sequence primer Forward (5'—3') | Sequence primer reverse (5'—3') |
|----------|---------------------------------|---------------------------------|
| gpw_2006 | ATGAGAAGGGGGTCAGGATT            | ACATGTTCAGCCCAGGAGAC            |
| gpw_2010 | ACCCATTGCCTTTCTTTTT             | TCTGTTGATGATCCGTCCAA            |
| gpw_2018 | ATGTAGGCAGAGCACACACG            | AGTCGATGAAAGGCAGCATC            |
| gpw_2029 | TAAAGCTAAACACGACGGGG            | CACCGCGAACGAATAAAAC             |
| gpw_2032 | CCTGGAAGAATAGACGTGCC            | CAAGATGGGGCAGAAGATGT            |
| gpw_2069 | AGGAGAAGGCGTAAGAACCC            | GGCAAGCTGGTCTGTGTAT             |
| gpw_2080 | ATCGCATGTAACTGCACAA             | CCTTTAATCGATTGCTCGGA            |
| gpw_2098 | ACACACCCGCAAAATAATCT            | TGACGCCACATAGGTCAATC            |
| gpw_2109 | TATATTGTCACGGGGCTTC             | TGGTGGAGAGTCTTGACTG             |
| gpw_2111 | AAATTTTTGTCTGCCGCTT             | CTTGTCGTTGAGAGTTGGA             |
| gpw_2115 | TTACAAGGCCGTAAATTGCC            | TGCTTGCTGACCACTGAATC            |
| gpw_2117 | TGGCCTGAAATCTTAGCCTG            | CAAGAATGCGATAAGATGGGA           |
| gpw_2125 | GGATGGGAAATGTTGGATG             | AAAATCAAACGGCAACTTGG            |
| gpw_2127 | GACAACACCGATCCGTAC              | TGTCCATGCGTTCTATTCCA            |
| gpw_2132 | TCCCCAAATATGTGGCTAT             | TATGTTGCATTGTGGTGGCT            |
| gpw_2138 | ATAGGAGGACTCCTGGGCTC            | TTGCCTCAACTAGATCGCCT            |
| gpw_2139 | TGTTAACCCAGTTTCTTATGC           | ACACTGATGCATCCCACAAA            |
| gpw_2140 | GTCCACGTGCTAGGGAGGTA            | ACATGCCCTAAGCTGCCCCA            |
| gpw_2142 | ACAACCTGCTCAGCTCCTTC            | GATTAATTAAGCCAGGGACCG           |
| gpw_2160 | ATTTACGGCTCGACCACTCA            | ACTGGAAGGGGGCGCAAGC             |
| gpw_2166 | GCCCCTGACATATTACTGT             | AAACTGGATGGTTGCATTCC            |
| gpw_2169 | GCCAGGCCATCAGTAAATTC            | AATGGGCACAATTTGAGAGC            |
| gpw_2216 | ACGAGGAATTGCATCCTAGC            | CAAAGTAGAAATTTATGCGCGA          |
| gpw_2222 | TCTCAGGAGCTAGCAGCACA            | CTTCTGCCGATACATCCCAT            |
| gpw_2228 | TGTAGCTTCTGCATCACAAA            | CAAACCTTGCAGCTGCATTA            |
| gpw_2229 | CTGCGTGCTCCTAATTT               | CTCCACCGTGTCTGGATAG             |
| gpw_2237 | CTTTGCTTGCGGTAGGAGAC            | TGATCTATCAGGGTGAGCCC            |
| gpw_2239 | CAACCATATGCCCAGGAGAC            | TGTTGCTGTCTGAAACAGGG            |
| gpw_2243 | GGGCAATCTGTTGGATCTGT            | CCACTTCGCTGCTGATGTAA            |
| gpw_2250 | AGCCATAGATGGCCCTACCT            | CACTCAATGGCAGGTCCTTT            |
| gpw_2253 | TGAGGAGAGGGGATATACGG            | TTTGGCAAATCTTATTGCC             |
| gpw_2258 | ATATAGGGCCGATGTGTGGA            | GGTCAGCAAAGTCAGCCTT             |
| gpw_2260 | CATCTCTACCCGATCCCTCA            | ACGCCGGTCTATTGAAAGTG            |
| gpw_2264 | TTGCTTTCCAAATTGTGCT             | GGCATTGAGAAATCCAAGCAT           |
| gpw_2266 | TTTTTGCCACACGGC                 | CGTGGAGGTGTCGACCTAAT            |
| gpw_2269 | CACATCAACAGTCTCTTCTA            | CTAGCTGGTGGTGGTCTTGG            |
| gpw_2270 | GAGGTCGTGAAGGGAAGG              | ATCGGACGGCCTGAGTTATA            |
| gpw_2275 | CTGCTGAACGTTGGAGGAT             | GGCCGTCTTTAGCTTTTGT             |
| gpw_2276 | ATAGGGTCTTCTGTGCC               | ACCCACAGTTGAAGTGGG              |
| gpw_2277 | TCAGAAGAGCGATGAGATAGAAA         | GCCATTTTGGGCTCAGTG              |
| gpw_2281 | TCATCATGGTATGAGCGTGG            | ACAAGCATTCCAATTTGCC             |
| gpw_2283 | CTCTGTCAACGAGCTGGA              | AATGGGCTCAGATGCTCTG             |
| gpw_2297 | TCGGAGAACCAAATGATCC             | GACTAACCACTGGGAGTCGC            |
| gpw_2302 | GCTTCACATCATAGTGTGATAAGA        | AAGCACCTCCCATGCATATC            |
| gpw_2308 | GGAGGAACCGAATCCAGAGT            | GAGGCCGATCACATAAAGGA            |
| gpw_2311 | CCAAAAGTGGTGGATCAAT             | TGCAAGAACAGCTTACCGTC            |
| gpw_2323 | AGAAGTTGGCTTCCGCTTTC            | AGTTGAAGATGGCCAGATG             |
| gpw_2328 | ATCCCAACAAACACTACCG             | TTGTCTCCATGACTATGTGGG           |
| gpw_2331 | GCGGGCTCAATATTGCTAGT            | GCATGGCTGAGGCTCAAGTA            |
| gpw_2335 | TTTGAGTTGCCACAAAAGT             | TGTTTTGTCTCACAGGCTGC            |
