# Supplementary material for: Crossability of Triticum urartu and Triticum monococcum Wheats, Homoeologous Recombination, and Description of a Panel of Interspecific Introgression Lines
Source: PubMed Central journal article supplement (PMC4199699; doi:10.1534/g3.114.013623), 2014-08-21
Supplement: supp_g3.114.013623_TableS3.pdf [file supp_g3.114.013623_TableS3.pdf]

**Table S3 List of the introgression lines created in this study.** For each introgression line the left and right markers delimiting the chromosome segments of *T. urartu* are reported. The intervals where each chromosome segment is anchored in the linkage map of *T. monococcum* are also reported.

| Linkage Group | Left Marker | Right Marker | Interval (cM) | Zygoty | IL Name    |
|---------------|-------------|--------------|---------------|--------|------------|
| 4             | Xgpw2279    | Xcfa2173     | 3.59          | Hetero | 7197-16-9  |
| 4             | Xcfa2256    | Xgpw2138     | 4.08          | Hetero | 7197-16-8  |
| 3             | Xwmc150a    | Xbarc67      | 21.4          | Hetero | 7197-16-7  |
| 3             | Xgpw2132    | Xbarc218     | 6.5           | Hetero | 7197-16-6  |
| 2             | Xgwm515     | Xgwm1045     | 3.62          | Hetero | 7197-16-4  |
| 2             | Xgpw1162    | Xgpw2089     | 4.0           | Homo   | 7197-16-3  |
| 1             | Xgpw2005    | Xcfa2226     | 5.8           | Hetero | 7197-16-2  |
| 7             | Xwmc405     | Xcfa2174     | 18.94         | Hetero | 7197-16-12 |
| 7             | Xcfd31      | Xcfa2049     | 16.47         | Hetero | 7197-16-11 |
| 7             | Xcfd31      | Xcfa2049     | 16.47         | Hetero | 7197-16-10 |
| 1             | Xgpw2277    | Xcfa2158     | 10.93         | Hetero | 7197-16-1  |
| 7             | Xcfd31      | Xwmc479      | 5.19          | Homo   | 7189-8-8   |
| 1             | Xcfd58      | Xgpw2277     | 22.13         | Homo   | 7189-2-2   |
| 5             | Xcfa2086    | Xwmc74       | 14.46         | Homo   | 7189-10-6  |
| 1             | Xgwm1104    | Xgpw2277     | 5.38          | Homo   | 7189-10-4  |
| 5             | Xgwm443     | Xgwm154      | 15.63         | Homo   | 7189-10-3  |
| 5             | Xbarc124b   | Xcfa2141     | 5.32          | Homo   | 7189-10-3  |
| 7             | Xcfd6       | Xcfa2174     | 4.96          | Homo   | 7189-10-14 |
| 5             | Xgwm126     | Xwmc74       | 18.27         | Homo   | 7189-10-13 |
| 1             | Xcfd58      | Xgpw2181     | 9.07          | Homo   | 7189-10-12 |
| 1             | Xbarc9      | Xbarc9       | 16.12         | Homo   | 7189-10-12 |
| 5             | Xgpw2098    | Xcfa2163     | 155.33        | Homo   | 7189-10-12 |
| 5             | Xcfa2141    | Xwmc74       | 61.71         | Homo   | 7188-1-2   |
| 3             | Xcfa2134b   | Xcfa2134a    | 84.9          | Homo   | 7188-1-1   |
| 5             | Xcfd39      | Xwmc74       | 25.53         | Homo   | 7183-8-2   |
| 1             | Xcfd58      | Xgpw2181     | 9.07          | Homo   | 7183-5-1   |
| 1             | Xcfa2158    | Xgpw2005     | 1.1           | Homo   | 7183-5-1   |
| 5             | Xcfd2b      | Xgwm271      | 35.61         | Homo   | 7183-5-1   |
| 6             | Xcfd190     | Xwmc96a      | 2.88          | Homo   | 7183-3-1   |
| 3             | Xwmc147     | Xcfd79       | 53.9          | Homo   | 7183-2-2   |
| 4             | Xwmc89      | Xcfa2173     | 31.11         | Homo   | 7183-2-2   |
| 3             | Xcfa2134b   | Xcfa2134b    | 14.7          | Homo   | 7183-2-1   |
| 3             | Xcfa2134b   | Xcfa2134b    | 14.7          | Homo   | 7183-1-2   |
| 3             | Xwmc147     | Xwmc147      | 15.5          | Homo   | 7183-1-1   |
| 3             | Xcfa2134b   | Xcfa2134b    | 14.7          | Homo   | 7181-1-2   |
| 7             | Xwmc405     | Xwmc405      | 2.0           | Homo   | 7180-3-4   |
| 5             | Xgwm271     | Xcfa2141     | 28.91         | Homo   | 7179-3-3   |
| 5             | Xbarc124b   | Xcfa2141     | 5.32          | Homo   | 7179-3-2   |
| 5             | Xcfd39      | Xgwm126      | 7.26          | Homo   | 7179-1-4   |
| 1             | Xgwm33      | Xcfd58       | 1.74          | Homo   | 7178-6-1   |
| 2             | Xgwm726     | Xwmc177      | 20.74         | Homo   | 7178-6-1   |
| 2             | Xgwm726     | Xwmc177      | 20.74         | Homo   | 7178-4-1   |
| 2             | Xgpw2125    | Xbarc124a    | 5.48          | Homo   | 7178-3-1   |
|               | Xwmc264     | Xgwm372      | 21.98         | Homo   | 7178-3-1   |
| 1             | Xcfd58      | Xgpw2181     | 9.07          | Homo   | 7178-1-1   |

|   |           |           |       |        |           |
|---|-----------|-----------|-------|--------|-----------|
| 7 | Xcfd6     | Xcfa2174  | 4.96  | Homo   | 7178-1-1  |
| 2 | Xgpw2127  | Xwmc177   | 43.94 | Homo   | 7177-9-1  |
| 3 | Xcfa2134b | Xgwm493   | 21.7  | Homo   | 7177-16-6 |
| 2 | Xgwm515   | Xgwm1045  | 3.62  | Hetero | 7177-16-5 |
| 3 | Xcfd79    | Xwmc527   | 78.0  | Homo   | 7177-16-5 |
| 2 | Xgpw2125  | Xbarc124a | 5.48  | Homo   | 7177-16-4 |
| 2 | Xgwm275   | Xwmc474   | 2.56  | Homo   | 7177-16-4 |
| 2 | Xgpw2281  | Xgwm30    | 5.09  | Homo   | 7177-16-3 |
| 3 | Xcfd79    | Xwmc527   | 78.0  | Homo   | 7177-16-3 |
| 2 | Xgpw2125  | Xbarc124a | 5.48  | Homo   | 7177-16-1 |
| 2 | Xgwm275   | Xwmc474   | 2.56  | Homo   | 7177-16-1 |
| 2 | Xgpw2281  | Xgwm30    | 5.09  | Homo   | 7177-16-1 |
| 3 | Xcfa2134b | Xgwm493   | 21.7  | Homo   | 7177-16-1 |
| 3 | Xcfa2134a | Xgwm1121  | 3.1   | Homo   | 7177-16-1 |
| 2 | Xwmc474   | Xgwm515   | 3.82  | Homo   | 7177-15-3 |
| 2 | Xgpw2281  | Xgwm30    | 5.09  | Homo   | 7177-15-3 |
| 7 | Xwmc405   | Xwmc405   | 2.0   | Homo   | 7176-11-1 |
| 4 | Xwmc89    | Xcfd71    | 3.26  | Homo   | 7138-5-2  |

---
