# Supplementary material for: Crossability of Triticum urartu and Triticum monococcum Wheats, Homoeologous Recombination, and Description of a Panel of Interspecific Introgression Lines
Source: G3 (Bethesda). 2014 Aug 21;4(10):1931–41. doi: 10.1534/g3.114.013623 (PMC4199699; doi:10.1534/g3.114.013623)
Supplement: Supporting Information [file supp_g3.114.013623_FileS2.xls]

## Sheet: Sheet1
Chromosome	Band	Parents
		mono	urartu	53-1	53-4	53-6	53-8	53-9	53-11	53-14	53-18	53-19	53-21	53-25	53-26	53-29	53-30	53-32	53-33	53-38	53-40	53-41	53-43	53-44	53-45	53-47	53-48	53-50	53-53	53-55	53-56	53-57	53-58	53-69	53-73	53-78	53-79	53-80	53-82	53-84	53-86	53-87	53-88	53-89	53-90	53-94	53-97	53-98	53-100
1	e404013	1	0	1	1	1	1	1	1	1	1	1	1	-	1	1	1	1	1	1	1	1	1	-	1	1	1	1	1	1	1	1	1	1	1	1	1	1	1	1	1	1	1	1	1	1	1	1	1
1	e355907	1	0	1	1	1	-	1	1	1	1	1	1	1	1	1	1	1	1	1	1	1	1	1	1	1	-	1	1	1	1	1	1	-	1	1	1	1	1	1	1	1	1	1	1	1	1	1	1
1	e366206	1	0	1	1	1	-	1	1	1	1	1	1	1	1	1	1	1	1	1	1	1	1	1	1	1	1	1	1	1	1	1	1	1	1	1	1	1	1	1	1	1	1	1	1	1	1	1	1
1	e376005	1	0	1	-	-	1	1	1	1	1	1	1	-	1	1	1	1	1	1	1	1	1	1	1	1	-	1	1	1	1	1	1	1	1	1	1	1	1	1	1	1	1	1	1	1	1	1	1
1	e326003	1	0	1	1	-	1	1	1	1	1	1	1	-	1	1	1	1	1	1	1	1	1	1	1	1	1	1	1	1	1	1	1	-	1	1	1	1	1	1	1	1	1	1	1	1	1	1	1
1	e364018	1	0	1	1	1	1	1	1	1	1	1	1	-	1	1	1	1	1	1	1	1	1	1	1	1	1	1	1	1	1	1	1	1	1	1	1	1	1	1	1	1	1	-	1	1	1	1	1
1	e376103	1	0	1	1	-	1	1	1	1	1	1	1	-	1	1	1	1	1	1	1	1	1	1	1	1	1	1	1	1	1	1	1	-	1	1	1	1	1	1	1	1	1	1	1	1	1	1	1
1	u413346	0	1	0	1	0	1	1	1	0	1	0	0	1	1	0	1	1	1	1	0	1	1	1	0	0	0	1	1	1	1	0	0	1	1	1	0	1	0	1	1	1	1	1	1	1	1	1	1
1	u413836	0	1	0	1	0	1	1	1	1	1	0	0	1	1	0	-	0	1	1	0	1	1	1	0	0	0	1	1	1	1	0	0	1	1	1	-	1	0	1	1	1	1	1	1	1	1	1	0
1	u4038e	0	1	1	1	0	1	1	1	1	1	0	0	1	1	0	1	0	1	1	-	-	1	1	0	0	0	1	1	1	1	0	0	-	1	1	0	1	0	1	1	1	1	-	1	1	1	1	1
1	u413848	0	1	0	0	0	1	1	1	1	1	0	0	1	0	1	-	0	1	1	1	1	1	1	0	0	0	1	1	1	1	0	0	1	1	1	-	1	0	1	1	1	1	0	1	1	1	1	1
1	u404028	0	1	0	0	0	1	1	1	1	1	0	0	-	0	1	1	0	1	1	1	1	1	-	0	0	0	1	1	1	1	0	0	1	1	1	0	1	0	1	1	1	1	0	1	1	1	1	1
1	u373829	0	1	0	0	0	1	1	1	1	1	0	0	-	0	-	1	0	1	1	1	1	1	1	0	0	0	1	1	1	1	0	0	1	1	-	0	1	0	1	1	1	1	-	1	1	1	1	1
1	e403255	1	0	1	1	1	0	1	1	1	1	1	1	1	1	1	1	1	1	1	0	1	1	1	1	1	-	1	1	1	0	1	1	1	1	1	1	1	1	1	1	0	1	-	1	1	1	1	1
1	e356001	1	0	1	1	-	0	1	0	1	1	1	1	-	-	1	1	0	1	1	1	1	1	1	1	0	1	1	1	1	0	1	1	-	1	1	1	1	1	0	1	0	1	0	1	1	1	1	1
1	e413851	1	0	1	1	1	1	1	1	0	1	1	1	1	1	1	-	0	0	1	1	1	1	1	1	0	1	1	1	1	1	1	1	1	1	1	-	1	1	0	1	1	1	1	1	1	1	1	0
1	e356006	1	0	1	1	-	1	1	1	1	1	1	1	-	-	1	1	1	1	1	1	1	1	1	1	1	1	1	1	1	1	1	1	-	1	1	1	1	1	1	1	1	1	1	1	1	1	1	1
1	e356104	1	0	1	1	-	1	1	1	1	1	1	1	-	1	1	1	1	1	-	1	1	1	1	1	1	1	1	1	1	1	1	1	-	1	1	1	1	1	1	1	1	1	1	1	1	1	1	1
1	e363625	1	0	1	1	1	1	1	1	1	1	1	1	-	1	1	1	1	1	1	1	1	1	1	1	1	1	1	1	1	1	1	1	1	1	-	1	1	1	1	1	1	1	1	1	1	1	1	1
1	e403212d	1	0	1	1	1	1	1	1	1	1	1	1	1	1	1	1	1	1	1	1	1	1	1	1	1	-	1	1	1	1	1	1	1	1	1	1	1	1	1	1	1	1	-	1	1	1	1	1
1	e4133b	1	0	1	1	1	1	1	1	1	1	1	1	1	1	1	1	1	1	1	1	1	1	1	1	1	1	1	1	1	1	1	1	1	1	1	1	1	1	1	1	1	1	1	1	1	1	1	1
1	e423301	1	0	1	1	1	1	1	1	1	1	1	1	1	1	1	1	1	1	1	1	1	1	1	1	1	1	1	1	1	1	1	1	1	1	1	1	1	1	1	1	1	1	-	1	1	-	1	1
1	u364028	0	1	1	1	1	1	1	1	1	1	1	1	-	1	1	1	1	1	1	1	1	1	1	1	0	1	1	1	0	1	1	0	1	1	1	0	1	1	1	1	1	1	-	1	1	1	0	1
1	e423330	1	0	1	1	1	1	1	1	1	0	1	1	0	1	1	1	1	1	0	1	0	0	0	1	1	0	1	1	1	1	1	1	0	1	0	1	0	1	0	1	1	1	-	1	0	-	1	0
1	e374026	1	0	0	0	1	0	1	0	1	-	1	1	-	1	1	0	1	1	1	0	1	0	1	1	1	1	1	1	1	1	1	1	0	1	-	1	1	0	1	1	1	1	1	1	0	1	1	0
1	e403251	1	0	0	0	1	0	1	0	1	1	1	1	0	1	1	0	1	1	1	1	1	0	1	1	1	-	1	1	1	1	1	1	0	1	1	1	1	0	1	1	1	1	-	0	0	1	1	0
1	u413343	0	1	1	1	1	1	1	1	1	1	1	1	1	1	1	1	1	1	0	1	1	1	0	1	1	0	1	1	0	1	1	1	1	1	0	1	1	1	0	0	1	0	1	1	1	1	0	1
1	e423229	1	0	0	1	1	0	1	0	1	1	0	1	0	1	0	0	1	1	-	1	1	1	1	1	1	1	1	1	1	1	0	1	0	0	1	0	1	0	1	1	1	1	-	0	0	0	1	1
1	e403215f	1	0	0	1	1	0	1	0	1	1	0	1	0	1	0	0	0	1	1	1	1	1	1	0	1	-	1	1	1	1	0	1	0	0	1	0	1	0	1	1	1	1	-	0	0	0	1	1
1	u403846	0	1	1	1	1	1	1	1	0	1	1	1	1	1	1	1	1	1	0	1	-	1	1	1	1	0	0	1	0	1	1	1	-	1	0	1	1	1	0	1	0	1	-	1	1	1	1	1
1	u424040	0	1	1	1	1	1	1	1	0	-	1	1	1	1	1	1	1	1	0	1	1	1	1	1	-	0	0	1	0	1	1	1	1	1	0	1	1	1	0	1	0	1	-	1	1	1	1	1
1	u403250	0	1	1	1	1	1	1	1	1	1	1	1	1	1	1	1	1	1	0	1	1	1	1	1	1	-	0	1	0	1	1	1	1	1	0	1	1	1	1	1	0	1	-	1	1	1	1	1
2	e363818	1	0	-	1	1	1	1	1	1	1	1	1	1	1	1	1	1	1	-	1	1	1	1	1	1	1	1	1	1	1	1	1	1	1	1	1	1	1	1	1	1	1	1	1	1	1	1	1
2	e374015	1	0	1	1	1	1	1	1	1	1	1	1	-	1	1	1	1	1	1	1	1	1	1	1	1	1	1	1	1	1	1	1	1	1	1	1	1	1	1	1	1	1	1	1	1	1	1	1
2	e356108	1	0	1	1	-	1	1	1	1	1	1	1	-	1	1	1	1	1	-	1	1	1	1	1	1	1	1	1	1	1	1	1	-	1	1	1	1	1	1	1	1	1	1	1	1	1	1	1
2	e413812b	1	0	1	1	1	1	1	1	1	1	1	1	1	1	1	-	1	1	1	1	1	1	1	1	1	1	1	1	1	1	1	1	1	1	1	-	1	1	1	1	1	1	1	1	1	1	1	1
2	e374019	1	0	1	1	1	1	1	1	1	1	1	1	-	1	1	1	1	1	1	1	1	1	1	1	1	1	1	1	1	1	1	1	1	1	-	1	1	1	1	1	1	1	1	1	1	1	1	1
2	e364009	1	0	1	1	1	1	1	1	1	1	1	1	-	1	1	1	1	1	1	1	1	1	1	1	1	1	1	1	1	1	1	1	1	1	1	1	1	1	1	1	1	1	-	1	1	1	1	1
2	e414014	1	0	1	1	1	1	1	1	1	1	1	1	1	1	1	1	1	1	-	1	1	1	1	1	1	-	1	1	1	1	1	1	1	1	1	1	1	1	1	1	1	1	-	1	1	1	1	1
2	e373807	1	0	1	1	1	1	1	1	1	1	1	1	-	1	-	1	1	1	1	1	1	1	1	1	1	1	1	1	1	1	1	1	1	1	-	1	1	1	1	1	1	1	-	1	1	1	1	1
2	e376109	1	0	1	1	-	1	1	1	1	1	1	1	-	1	1	1	1	1	1	1	1	1	1	1	1	1	1	1	1	1	1	1	-	1	1	1	1	1	1	1	1	1	1	1	1	1	1	1
2	e423321	1	0	1	1	1	1	1	1	1	1	1	1	1	1	1	1	1	1	1	1	1	1	1	1	1	1	1	1	1	1	1	1	1	1	1	1	1	1	1	1	1	1	-	1	1	-	1	1
3	e403224	1	0	1	1	1	1	1	1	1	1	1	1	1	1	1	1	1	1	1	1	1	1	1	1	1	-	1	1	1	1	1	1	1	1	1	1	1	1	1	1	1	1	-	1	1	1	1	1
3	e404025	1	0	1	1	1	1	1	1	1	1	0	1	-	1	1	1	1	1	1	1	0	1	-	1	1	0	1	0	1	1	1	1	1	1	1	1	1	1	0	1	1	1	0	1	0	1	1	1
3	e373820	1	0	1	1	-	1	1	1	1	1	0	1	-	1	-	0	1	1	1	1	1	1	1	1	-	0	1	0	1	1	1	1	1	1	-	1	1	1	0	1	1	-	-	1	0	1	1	1
3	e424041	1	0	1	1	1	1	1	1	1	-	1	1	1	1	1	1	1	1	1	1	1	1	1	1	-	1	1	0	1	1	1	1	1	1	1	1	1	1	0	1	1	1	-	1	0	1	1	1
3	u413340	0	1	0	0	1	1	0	0	0	0	1	1	1	1	1	1	1	1	1	0	1	1	1	0	0	1	0	1	0	0	1	1	1	1	0	1	1	1	1	0	1	1	0	0	1	0	1	1
3	u404032	0	1	0	0	0	1	0	0	0	0	1	0	-	1	1	1	0	1	0	0	1	1	-	0	0	1	0	1	0	0	1	1	1	0	1	1	1	1	1	0	1	1	1	0	1	1	1	1
3	u403851	0	1	1	0	0	1	0	0	0	0	1	0	1	1	1	1	0	1	0	0	-	1	1	0	0	1	0	1	0	0	1	1	-	0	0	1	1	1	1	0	1	1	-	0	1	0	1	1
3	u413842	0	1	0	0	1	1	0	0	0	0	1	1	1	1	1	-	1	1	1	0	1	1	1	0	0	1	0	1	0	0	1	1	1	1	0	-	1	1	1	0	1	1	1	0	1	0	1	1
3	u414030	0	1	0	0	1	1	0	-	0	0	0	1	1	1	1	1	1	1	-	0	1	0	1	0	0	-	0	1	0	0	1	1	1	1	0	1	1	1	1	1	1	1	-	0	1	0	1	1
3	u373821	0	1	0	0	-	1	0	0	0	0	1	0	-	1	-	1	0	1	0	0	1	1	1	0	-	1	0	1	0	0	1	1	1	0	-	1	1	1	1	0	1	-	-	0	1	0	1	1
3	u413344	0	1	0	0	0	1	0	0	0	0	1	1	1	1	1	1	1	1	0	0	1	1	1	0	0	1	0	1	0	0	1	1	1	0	0	1	1	1	1	0	1	1	1	0	1	0	1	1
3	u363637	0	1	0	0	0	1	0	0	0	0	1	1	-	1	1	1	1	1	0	0	1	1	1	0	0	1	0	1	0	0	1	1	1	0	-	1	1	1	1	0	1	1	1	0	1	0	1	1
3	u363815	0	1	-	0	1	1	0	0	0	0	1	1	1	1	1	1	1	1	-	0	1	1	1	0	0	1	0	1	0	0	1	1	1	1	0	1	1	1	1	0	1	1	1	0	1	0	1	1
3	u373822	0	1	0	0	-	1	0	0	0	0	1	1	-	1	-	1	1	1	1	0	1	1	1	0	0	1	0	1	0	0	1	1	1	1	-	1	1	1	1	0	1	1	-	0	1	0	1	1
3	e403259	1	0	1	1	1	1	1	1	1	1	0	1	1	1	1	0	1	1	1	1	0	1	1	1	1	-	1	0	1	1	1	1	1	1	1	1	1	1	1	1	1	1	-	1	0	1	1	1
3	e374034	1	0	1	1	1	1	1	1	1	1	0	1	-	1	1	0	1	1	1	1	0	1	1	1	1	1	1	0	1	1	1	1	1	1	1	1	1	1	0	1	1	1	1	1	0	1	1	1
3	e413232	1	0	1	1	1	1	1	1	1	1	1	1	1	1	1	0	1	1	1	1	0	1	1	1	1	-	1	0	1	1	1	1	1	1	1	1	1	1	0	1	1	1	-	1	0	1	1	1
3	e414036	1	0	1	1	1	1	1	1	1	1	1	1	1	1	1	0	1	1	-	1	1	1	1	1	1	-	1	0	1	1	1	1	1	1	1	1	1	1	0	1	1	1	-	1	0	1	1	1
3	e404026	1	0	1	1	1	0	1	1	1	1	0	1	-	1	1	0	1	1	1	1	0	1	-	1	1	1	1	0	1	1	1	1	1	1	1	1	1	1	0	1	1	1	0	1	0	1	1	1
3	e423314	1	0	1	1	1	1	1	1	1	1	0	1	1	1	1	0	1	1	1	1	1	1	1	1	1	0	1	0	1	1	1	1	1	1	1	1	1	1	0	1	1	1	-	1	0	-	-	-
3	u373337	0	1	0	0	1	1	0	0	0	0	1	1	-	1	1	1	1	1	1	0	1	1	1	0	0	1	0	1	0	0	1	1	1	1	-	1	1	1	1	0	1	1	1	0	1	0	1	1
3	u363642	0	1	0	0	1	1	0	0	0	0	1	1	-	1	1	1	1	1	1	0	1	1	1	0	0	1	0	1	0	0	1	1	1	1	-	1	1	1	1	0	1	1	1	0	1	0	1	1
3	u363635	0	1	0	0	1	1	0	0	0	0	1	1	-	1	1	1	1	1	1	0	1	1	1	0	0	1	0	1	0	0	1	1	1	1	-	1	1	1	1	0	1	1	0	0	1	0	1	1
3	u363636	0	1	0	0	1	1	0	0	0	0	1	1	-	1	1	1	1	1	1	0	1	1	1	0	0	0	0	1	0	0	1	1	1	1	-	1	1	1	1	0	1	1	0	0	1	0	1	1
3	u423846	0	1	0	0	1	1	0	0	0	0	1	1	1	1	1	1	1	1	1	-	1	1	1	0	0	0	-	1	0	0	1	1	1	1	0	1	1	1	1	0	1	1	-	0	1	0	1	1
3	u424045	0	1	0	0	1	1	0	0	0	-	1	1	1	1	1	1	1	1	1	0	1	1	1	0	-	0	0	1	0	0	1	1	1	1	0	1	1	1	1	0	1	1	-	0	1	0	1	1
3	e326101	1	0	1	1	1	1	1	1	1	1	1	1	1	1	1	1	1	1	1	1	1	1	1	1	1	1	1	1	1	1	1	1	1	1	1	1	1	1	1	1	1	1	1	1	-	1	1	1
3	e326112	1	0	1	1	1	1	1	1	1	1	1	1	1	1	1	1	1	1	1	1	1	1	1	1	1	1	1	1	1	1	1	1	1	1	1	1	1	1	1	1	1	1	1	1	-	1	1	1
3	e423319	1	0	1	1	1	1	1	1	1	1	1	1	1	1	1	1	1	1	1	1	1	1	1	1	1	1	1	1	1	1	1	1	1	1	1	1	1	1	1	1	1	1	-	1	1	-	1	1
4	e404017	1	0	1	1	1	1	1	1	1	1	1	1	-	1	1	1	1	1	1	1	1	1	-	1	1	1	1	1	1	1	1	1	1	1	1	1	1	1	1	1	1	1	1	1	1	1	1	1
4	e374806	1	0	1	1	-	1	1	-	1	1	1	1	-	1	1	1	1	1	1	1	1	1	1	1	1	1	1	1	1	1	1	1	1	1	1	1	1	1	1	1	1	1	1	1	1	1	1	1
4	e4240a	1	0	1	1	1	1	1	1	1	-	1	1	1	1	1	1	1	1	1	1	1	1	1	1	-	1	1	1	1	1	1	1	1	1	1	1	1	1	1	1	1	1	-	1	1	1	1	1
4	e373316	1	0	1	1	1	1	1	1	1	1	1	1	-	1	1	1	1	1	1	1	1	1	1	1	1	1	1	1	1	1	1	1	1	1	-	1	1	1	1	1	1	1	1	1	1	1	1	1
4	e374010	1	0	1	1	1	1	1	1	1	1	1	1	-	1	1	1	1	1	1	1	1	1	1	1	1	1	1	1	1	1	1	1	1	1	1	1	1	1	1	1	1	1	1	1	1	1	1	1
4	e403225	1	0	1	1	1	1	1	1	1	1	1	1	1	1	1	1	1	1	1	1	1	1	1	1	1	-	1	1	1	1	1	1	1	1	1	1	1	1	1	1	1	1	-	1	1	1	1	1
4	u424013	0	1	1	1	1	1	1	1	1	-	1	0	1	1	0	1	0	1	1	1	1	0	1	1	-	1	1	0	1	1	1	1	1	1	0	1	1	1	1	1	1	1	-	0	1	1	1	1
4	u404003	0	1	0	1	0	1	1	1	1	1	0	0	-	1	0	1	0	1	1	1	1	0	-	1	1	0	1	0	1	1	1	1	1	1	0	1	1	1	1	1	1	1	1	0	1	1	1	1
4	e403208	1	0	1	1	1	1	1	1	0	1	1	1	1	0	1	0	1	1	0	1	0	1	1	1	1	-	1	1	0	0	1	0	1	0	1	1	0	1	1	1	1	1	-	1	0	1	1	0
4	e423234	1	0	0	1	1	1	1	0	1	1	1	1	1	1	1	1	1	1	-	1	1	1	1	1	1	1	1	1	1	1	1	1	1	1	1	1	1	1	1	1	1	1	-	0	1	1	1	1
4	e413838	1	0	0	1	1	1	1	0	1	1	1	1	0	1	1	-	1	1	1	1	1	1	1	1	1	1	1	1	1	1	1	1	1	1	1	-	1	1	1	1	1	1	0	0	1	1	1	1
4	e373824	1	0	0	1	1	1	1	0	1	1	1	1	-	1	-	1	1	1	1	1	1	1	1	1	1	1	1	1	1	1	1	1	1	1	-	1	1	1	1	1	1	1	-	0	1	1	1	1
4	e373332	1	0	0	1	1	1	1	0	1	1	1	1	-	1	1	1	1	1	1	1	1	1	1	1	-	1	1	1	1	1	1	1	1	1	-	1	1	1	1	1	1	1	1	0	1	1	1	1
4	e374024	1	0	-	1	1	1	1	0	1	1	1	1	-	1	1	1	1	1	1	1	1	1	1	1	1	1	1	1	1	1	1	1	1	1	1	1	1	1	1	1	1	1	1	0	1	0	1	1
4	e413234	1	0	0	1	1	1	1	0	1	1	1	1	0	1	1	1	1	1	1	1	1	1	1	1	1	-	1	1	1	1	1	1	1	1	1	1	1	1	1	1	1	1	-	0	1	1	1	1
4	e413204	1	0	0	0	1	1	1	0	1	1	1	1	0	1	1	1	1	1	1	1	1	1	1	1	1	-	1	1	1	1	1	1	1	1	1	1	1	1	1	1	1	1	-	0	1	1	1	1
5	e403835	1	0	1	1	1	1	1	1	1	1	1	1	1	1	1	1	1	1	1	1	-	1	1	1	1	1	1	1	1	1	1	1	-	1	1	1	1	1	1	1	1	1	-	1	1	1	1	1
5	e364029	1	0	1	1	1	1	1	0	1	1	1	1	-	1	1	1	1	1	1	1	1	0	1	1	1	1	1	1	1	1	1	1	1	1	0	1	1	1	1	0	1	1	-	1	0	0	0	1
5	e424034	1	0	1	1	1	1	1	0	1	-	1	1	1	1	1	1	1	1	1	1	1	0	1	1	-	1	1	1	1	1	1	1	1	1	1	1	1	1	1	1	1	1	-	1	1	0	0	1
5	e404029	1	0	1	1	1	1	1	0	1	0	1	1	-	1	1	1	1	1	1	1	1	0	-	1	1	1	1	0	1	1	1	1	1	1	1	1	1	1	1	1	1	1	1	1	1	0	0	1
5	u404028	0	1	0	0	0	1	1	1	1	1	0	0	-	0	1	1	0	1	1	1	1	1	-	0	0	0	1	1	1	1	0	0	1	1	1	0	1	0	1	1	1	1	0	1	1	1	1	1
5	u373829	0	1	0	0	0	1	1	1	1	1	0	0	-	0	-	1	0	1	1	1	1	1	1	0	0	0	1	1	1	1	0	0	1	1	-	0	1	0	1	1	1	1	-	1	1	1	1	1
5	e356113	1	0	1	1	-	1	1	1	1	1	1	1	-	1	1	1	1	1	-	1	1	1	1	1	1	1	1	1	1	1	1	1	-	1	1	1	1	1	1	1	1	1	1	1	1	1	1	1
5	e413815	1	0	1	1	1	1	1	1	1	1	1	1	1	1	1	-	1	1	1	1	1	1	1	1	1	1	1	1	1	1	1	1	1	1	1	-	1	1	1	1	1	1	1	1	1	1	1	1
5	e355902	1	0	1	1	1	-	1	1	1	1	1	1	1	1	1	1	1	1	1	1	1	1	1	1	1	-	1	1	1	1	1	1	-	1	1	1	1	1	1	1	1	1	1	1	1	1	1	1
5	e413328	1	0	1	1	1	1	1	1	1	1	1	1	1	1	1	1	1	1	1	1	1	1	1	1	1	1	1	1	1	1	1	1	1	1	1	1	1	1	1	1	1	1	1	1	1	1	1	1
5	e363819	1	0	-	1	1	1	1	1	1	1	1	1	1	1	1	1	1	1	-	1	1	1	1	1	1	1	1	1	1	1	1	1	1	1	1	1	1	1	1	1	1	1	1	1	1	1	1	1
5	e373211	1	0	1	1	1	1	1	1	-	1	1	1	1	1	-	-	1	1	-	1	1	1	1	1	1	1	1	1	1	1	1	1	1	1	1	1	1	1	1	1	1	1	1	1	1	1	1	1
5	e373304	1	0	1	1	1	1	1	1	1	1	1	1	-	1	1	1	1	1	1	1	1	1	1	1	1	1	1	1	1	1	1	1	1	1	-	1	1	1	1	1	1	1	1	1	1	1	1	1
5	u413837	0	1	0	0	1	0	1	0	1	1	1	1	1	0	1	-	0	1	1	1	1	0	1	1	1	1	1	0	0	0	0	1	1	1	1	-	1	0	1	0	1	1	1	1	1	1	1	1
5	u373342	0	1	0	0	1	0	1	0	1	1	1	1	-	1	1	1	0	1	1	0	1	0	1	1	1	0	1	1	0	1	0	1	1	1	-	0	1	0	1	0	1	1	1	1	1	1	1	1
5	u374032	0	1	0	0	1	0	1	0	1	1	1	1	-	1	1	1	0	1	1	0	1	0	1	1	1	1	1	1	0	1	0	1	1	1	1	0	1	0	1	0	1	1	1	1	1	1	1	1
5	u413342	0	1	0	0	1	0	1	0	1	1	1	1	1	1	1	1	0	1	1	0	1	0	1	1	1	1	1	1	0	1	0	1	1	1	1	0	1	0	1	0	1	1	1	1	1	1	1	1
5	u424037	0	1	0	0	1	0	1	0	1	-	1	1	1	0	1	1	0	1	1	1	1	0	1	1	-	1	1	0	0	0	0	1	1	1	1	0	1	0	1	0	1	1	-	1	1	1	1	1
5	u423844	0	1	0	0	1	0	1	0	1	1	1	1	1	0	1	1	0	1	1	-	1	0	1	1	1	1	-	0	0	0	0	1	1	1	1	0	1	0	1	0	1	1	-	1	1	1	1	1
5	u374027	0	1	0	0	1	0	1	0	1	1	1	1	-	0	1	1	0	1	1	1	1	0	1	1	1	1	1	0	0	0	0	1	1	1	-	0	1	0	1	0	1	1	1	1	1	1	1	1
5	u374028	0	1	0	0	1	0	1	0	1	1	1	1	-	0	1	1	0	1	1	1	1	0	1	1	1	1	1	0	0	0	0	1	1	1	-	0	1	0	1	0	1	1	1	1	1	1	1	1
5	u374031	0	1	0	0	1	1	1	0	1	1	1	1	-	0	1	1	0	1	1	1	1	0	1	1	1	1	1	0	0	0	0	1	1	1	1	0	1	0	1	0	1	1	1	1	1	1	1	1
5	u403262	0	1	0	0	1	0	1	0	1	1	1	1	1	0	1	0	0	1	1	1	1	0	1	0	1	-	1	0	0	0	0	1	1	1	1	0	1	0	0	0	0	0	-	1	1	1	1	1
5	u403843	0	1	1	0	1	0	1	0	1	1	1	1	1	0	1	0	0	1	1	1	-	0	1	0	1	1	0	0	0	0	0	1	-	1	1	0	1	0	1	0	1	1	-	1	1	1	1	1
5	u363633	0	1	1	0	1	0	1	0	1	1	1	1	-	0	1	1	0	1	1	1	1	0	1	1	1	1	1	0	0	0	0	1	1	1	-	0	1	0	1	0	1	1	1	1	1	1	1	1
5	e364030	1	0	1	1	0	1	0	1	1	1	1	1	-	1	1	1	1	1	0	1	0	1	1	1	0	0	1	1	1	1	1	1	1	1	1	1	1	1	1	1	1	1	-	0	1	1	1	1
5	e356109	1	0	1	1	-	1	0	1	1	1	1	1	-	1	1	1	1	1	-	1	0	1	1	1	0	0	1	1	1	1	1	1	-	1	1	1	1	1	1	1	1	1	1	0	1	1	1	1
5	e364024	1	0	1	1	1	1	0	1	1	1	1	1	-	1	1	1	1	1	0	1	0	1	1	1	0	1	1	1	1	1	1	1	1	1	1	1	1	1	1	1	1	1	-	0	1	1	1	1
5	e363632	1	0	1	1	0	1	0	1	1	1	1	1	-	1	1	1	1	1	0	1	0	1	1	1	1	1	1	1	1	1	1	1	1	1	-	1	1	1	1	1	1	1	1	0	1	1	1	1
5	e326008	1	0	1	1	-	1	0	1	1	1	1	1	-	1	1	1	1	1	1	1	0	1	1	1	1	0	1	1	1	1	1	1	-	1	1	1	1	1	1	1	1	1	1	0	1	1	1	1
5	e413833	1	0	1	1	0	1	0	1	1	1	1	1	1	1	1	-	1	1	0	1	0	1	1	1	0	0	1	1	1	1	1	1	1	1	1	-	1	1	1	1	1	1	1	0	1	1	1	1
5	e413846	1	0	1	1	0	1	0	1	1	1	1	1	1	1	1	-	1	1	1	1	0	1	1	1	1	1	1	1	1	1	1	1	1	1	1	-	1	1	1	1	1	1	1	1	1	1	1	1
5	u413839	0	1	0	0	1	0	1	0	1	1	1	1	1	1	1	-	1	1	1	0	1	1	1	1	1	1	1	1	0	1	0	1	1	1	1	-	1	0	1	1	0	0	1	1	1	1	1	0
5	u363643	0	1	0	0	1	0	1	0	1	1	1	1	-	1	1	1	1	1	1	0	1	0	1	1	1	1	1	1	0	1	0	1	1	1	-	0	1	0	1	1	0	0	0	1	1	1	1	0
5	u374029	0	1	0	0	1	0	1	0	1	1	1	0	-	1	1	1	0	1	1	0	1	0	1	1	1	1	1	1	0	1	0	1	0	1	-	0	1	0	1	1	0	0	-	1	1	1	1	0
6	e363805	1	0	-	1	1	1	1	1	1	1	1	1	1	1	1	1	1	1	-	1	1	1	1	1	1	1	1	1	1	1	1	1	1	1	1	1	1	1	1	1	1	1	1	1	1	1	1	-
6	e373208	1	0	1	1	1	1	1	1	-	1	1	1	1	1	-	-	1	1	-	1	1	1	1	1	1	1	1	1	1	1	1	1	1	1	1	1	1	1	1	1	1	1	1	1	1	1	1	1
6	e363812	1	0	-	1	1	1	1	1	1	1	1	1	1	1	1	1	1	1	-	1	1	1	1	1	1	1	1	1	1	1	1	1	1	1	1	1	1	1	1	1	1	1	1	1	1	1	1	1
6	e3733b	1	0	1	1	1	1	1	1	1	1	1	1	-	1	1	1	1	1	1	1	1	1	1	1	1	1	1	1	1	1	1	1	1	1	-	1	1	1	1	1	1	1	1	1	1	1	1	1
6	e403217	1	0	1	1	1	1	1	1	1	1	1	1	1	1	1	1	1	1	1	1	1	1	1	1	1	-	1	1	1	1	1	1	1	1	1	1	1	1	1	1	1	1	-	1	1	1	1	1
6	e424003	1	0	1	1	1	1	1	1	1	-	1	1	1	1	1	1	1	1	1	1	1	1	1	1	-	1	1	1	1	1	1	1	0	1	1	1	1	1	0	1	0	0	-	0	0	1	1	1
6	e373334	1	0	0	1	1	1	1	1	1	0	1	1	-	0	1	1	1	0	1	1	1	0	1	1	1	1	1	1	1	1	1	0	0	1	-	1	1	1	0	1	1	0	0	0	0	1	1	1
6	e366212	1	0	0	1	1	-	1	1	1	0	1	1	1	0	1	1	1	0	1	1	1	0	1	1	1	1	1	1	1	1	1	0	0	1	1	1	1	1	0	1	1	0	0	0	0	1	1	1
6	e364027	1	0	0	1	1	1	1	1	1	0	1	1	-	0	1	1	1	0	1	1	1	0	1	1	1	1	1	1	1	1	1	0	0	1	1	1	1	1	0	1	1	0	-	0	0	1	1	1
6	e364031	1	0	0	1	1	1	1	1	1	0	1	1	-	0	1	1	1	0	1	1	1	0	1	1	1	1	1	1	1	1	1	0	0	1	1	1	1	1	0	1	1	0	-	0	0	1	1	1
6	e326105	1	0	0	1	1	1	1	1	1	0	1	1	1	0	1	1	1	0	1	1	1	0	1	1	1	1	1	1	1	1	1	0	0	1	1	1	1	1	0	1	1	1	0	0	-	1	1	1
6	e374035	1	0	0	1	1	1	1	1	1	0	1	1	-	0	1	1	1	0	1	1	1	0	1	1	1	1	1	1	1	1	1	0	0	1	1	1	1	1	0	1	1	0	0	0	0	1	1	1
6	e423328	1	0	0	1	1	1	1	1	1	0	1	1	1	0	1	1	1	0	1	1	1	0	1	1	1	1	1	1	1	1	1	0	0	1	1	1	1	1	0	1	1	0	-	0	0	-	1	1
6	e404020	1	0	0	1	1	1	1	1	1	0	1	1	-	0	1	1	1	0	1	1	1	0	-	1	0	1	0	1	1	1	1	0	0	1	1	1	1	1	0	1	1	0	0	0	1	1	1	1
6	e403254	1	0	0	1	1	1	1	1	1	1	1	1	0	0	1	1	1	0	1	1	1	0	1	1	1	-	1	1	1	1	1	0	0	1	1	1	1	1	1	1	1	0	-	0	0	1	1	1
6	e413224	1	0	0	1	1	1	1	1	1	1	1	1	1	1	1	1	1	0	1	1	1	0	1	1	1	-	0	1	1	1	1	0	0	1	1	1	1	1	0	1	1	0	-	0	0	1	1	1
6	e414037	1	0	0	1	1	1	0	1	0	0	1	1	1	0	1	1	1	0	-	1	1	0	1	1	1	-	0	1	1	1	1	0	0	1	1	1	1	1	0	1	1	0	-	0	0	0	1	0
6	u423802	0	1	1	1	0	1	1	1	1	0	0	1	0	1	1	1	1	1	-	-	1	1	0	1	-	-	-	0	1	1	0	0	1	1	1	1	1	1	0	0	1	0	-	-	1	1	1	0
6	u424046	0	1	1	1	1	0	1	1	1	-	0	1	0	1	1	1	1	1	0	0	1	1	0	1	-	1	1	0	1	1	0	0	1	1	1	1	1	1	0	0	1	0	-	1	1	1	1	0
6	u374036	0	1	1	1	1	0	0	1	1	-	0	1	-	0	1	0	1	1	0	-	1	1	0	1	1	1	1	1	1	1	1	0	1	1	-	1	1	1	0	0	1	0	1	1	1	1	1	0
6	u414031	0	1	1	1	1	0	1	-	1	0	0	1	0	1	1	0	1	1	-	0	1	1	0	1	1	-	1	1	1	1	1	0	1	1	0	1	1	1	0	0	1	0	-	1	1	1	1	0
6	e326111	1	0	0	1	1	1	1	1	0	0	1	1	1	0	1	1	0	1	1	1	1	1	1	1	1	1	0	1	1	0	1	1	1	1	1	1	1	1	1	1	0	1	1	1	-	1	1	0
6	e413306	1	0	0	1	1	0	1	1	0	0	1	1	1	0	1	1	0	1	1	1	1	1	1	0	1	1	0	1	1	0	1	1	1	1	1	1	1	1	1	1	1	0	0	1	1	1	1	0
6	e374808	1	0	1	1	-	1	1	-	1	1	1	1	-	1	1	1	1	1	1	1	1	1	1	1	1	1	1	1	1	1	1	1	1	1	1	1	1	1	1	1	1	1	1	1	1	1	1	1
6	e403818	1	0	1	1	1	1	1	1	1	1	1	1	1	1	1	1	1	1	1	1	-	1	1	1	1	1	1	1	1	1	1	1	-	1	1	1	1	1	1	1	1	1	-	1	1	1	1	1
6	e403831	1	0	1	1	1	1	1	1	1	1	1	1	1	1	1	1	1	1	1	1	-	1	1	1	1	1	1	1	1	1	1	1	-	1	1	1	1	1	1	1	1	1	-	1	1	1	1	1
6	e326006	1	0	1	1	-	1	1	1	1	1	1	1	-	1	1	1	1	1	1	1	1	1	1	1	1	1	1	1	1	1	1	1	-	1	1	1	1	1	1	1	1	1	1	1	1	1	1	1
6	e413814d	1	0	1	1	1	1	1	1	1	1	1	1	1	1	1	-	1	1	1	1	1	1	1	1	1	1	1	1	1	1	1	1	1	1	1	-	1	1	1	1	1	1	1	1	1	1	1	1
7	e423806	1	0	1	1	1	1	1	1	0	1	1	1	1	1	1	1	0	1	0	-	1	1	1	1	1	1	-	1	1	1	1	1	1	1	1	1	1	1	1	1	1	1	-	0	1	1	1	1
7	e403247	1	0	1	1	1	1	1	1	1	1	1	1	1	1	1	1	0	1	1	1	1	1	1	1	1	-	0	1	1	1	1	1	1	1	1	1	1	1	1	1	1	1	-	0	1	1	1	1
7	u403841	0	1	1	0	1	1	1	0	1	1	1	1	1	1	1	1	1	1	1	1	-	1	0	1	1	1	1	1	0	1	0	0	-	1	1	1	1	1	1	1	0	0	-	1	1	1	1	0
7	u373828	0	1	0	0	1	1	1	0	1	1	1	1	-	1	-	0	1	1	1	1	0	1	0	1	1	1	1	1	0	1	0	0	1	1	-	1	1	1	1	1	1	0	-	1	1	1	1	0
7	u424039	0	1	0	0	1	1	1	0	1	-	1	1	1	1	1	1	1	1	1	1	0	1	0	1	-	0	1	1	0	1	0	0	1	1	1	1	1	1	1	1	1	0	-	1	1	1	1	0
7	u413235	0	1	1	0	0	1	1	0	1	1	1	1	1	1	1	0	1	1	1	1	1	1	0	1	1	-	1	1	1	1	0	0	1	1	1	1	1	1	1	1	1	0	-	1	1	1	1	1
7	u364035	0	1	1	0	0	1	1	0	1	1	1	1	-	1	1	0	1	1	1	1	1	1	0	1	0	0	1	0	1	1	1	0	1	1	1	1	0	1	1	1	1	0	-	1	1	1	1	1
	e326001	1	0	1	1	-	1	1	1	1	1	1	1	-	1	1	1	1	1	1	1	1	1	1	1	1	1	-	1	1	1	1	1	-	1	1	1	1	1	1	1	1	1	1	1	1	1	1	1
	e326012	1	0	0	0	-	1	0	0	0	0	1	1	-	1	1	1	1	1	1	0	1	1	1	0	0	1	0	1	0	0	1	1	-	1	0	1	1	1	1	0	1	1	1	0	1	0	1	1
	e326004	1	0	1	1	-	1	1	1	1	1	1	1	-	1	1	1	1	1	1	1	1	1	1	1	1	1	1	1	1	1	1	1	-	1	1	1	1	1	1	1	1	1	1	1	1	1	1	1
	e326104	1	0	1	1	0	1	0	0	1	1	1	0	1	1	0	0	0	0	0	0	1	0	0	1	0	0	0	1	1	0	1	1	1	0	0	0	1	0	0	1	0	0	1	1	-	1	0	1
	e326106	1	0	1	1	1	1	0	1	0	1	1	1	1	1	1	1	1	1	1	1	0	1	1	1	1	1	1	1	1	1	1	1	1	1	1	1	1	1	1	1	1	1	1	0	-	1	1	1
	e326107	1	0	1	1	1	1	1	1	1	1	1	1	1	1	1	1	1	1	1	1	1	1	1	1	1	1	1	1	1	1	1	1	1	1	1	1	1	1	1	1	1	1	1	1	-	1	1	1
	e326113	0	1	0	0	1	1	1	0	1	1	1	1	1	1	1	1	1	1	1	1	0	1	0	1	1	1	1	1	0	1	0	0	1	1	1	1	1	1	1	1	1	1	0	1	-	1	1	0
	e355912	1	0	0	0	0	-	0	0	0	0	0	0	0	0	0	0	0	0	0	0	0	0	0	0	0	-	0	0	0	0	0	0	-	0	0	0	0	0	0	0	0	0	0	0	0	0	0	0
	e363623	1	0	0	0	0	0	0	0	0	0	0	0	-	0	0	0	0	0	0	0	0	0	0	0	0	0	0	0	0	0	0	0	0	0	-	0	0	0	0	0	0	0	0	0	0	0	0	0
	e363631	1	0	0	0	0	0	0	0	0	0	0	1	-	0	0	1	1	1	1	1	0	0	1	1	1	1	1	0	1	1	1	1	1	1	-	1	1	1	0	1	1	1	0	1	0	1	1	1
	e363634	0	1	1	0	0	0	1	0	1	0	1	1	-	1	0	0	1	1	1	1	1	0	0	1	1	1	1	1	1	1	1	0	1	0	-	0	1	0	1	1	1	0	1	1	1	1	1	1
	e363638	1	0	1	1	1	1	1	1	1	1	1	1	-	1	1	1	1	1	0	1	1	1	1	1	1	1	1	1	1	1	1	1	1	1	-	1	1	1	1	1	1	1	1	1	1	1	1	1
	e363639	0	1	0	0	0	1	0	0	0	0	1	1	-	1	1	1	1	1	0	0	1	1	1	0	0	1	0	1	0	0	1	1	1	0	-	1	1	1	1	0	1	1	1	0	1	0	1	1
	e363640	1	0	1	1	0	1	0	1	1	1	1	1	-	1	1	1	1	1	0	1	0	1	1	1	0	0	1	1	1	1	1	1	1	1	-	1	1	1	1	1	1	1	1	0	1	1	1	1
	e363641	1	0	1	1	1	1	1	1	1	1	0	1	-	1	1	0	1	1	1	1	1	1	1	1	1	1	1	0	1	1	1	1	1	1	-	1	1	1	0	1	1	1	1	1	0	1	1	1
	e363629	0	1	0	1	0	0	1	0	1	1	1	1	-	1	0	0	0	1	1	1	1	1	0	0	1	0	1	0	1	1	0	1	0	0	-	0	1	0	1	0	1	1	1	1	1	1	1	1
	e363817	1	0	-	0	1	0	0	0	1	1	0	0	1	1	1	1	1	0	-	1	1	1	1	1	1	1	1	0	0	0	0	1	1	1	1	1	0	0	1	0	0	1	1	1	1	1	1	1
	e364001	0	1	0	0	0	0	0	0	0	0	0	0	-	0	0	0	0	0	0	0	0	0	0	0	0	1	0	0	0	0	0	0	0	0	0	0	0	0	0	0	0	0	-	0	0	0	0	0
	e364012	1	0	1	1	1	1	1	1	1	1	1	1	-	1	1	1	1	1	1	1	1	1	1	1	1	1	1	1	1	1	1	1	1	1	1	1	1	1	1	1	1	1	-	1	1	1	1	1
	e364021	0	1	1	1	1	0	1	1	1	1	1	1	-	1	1	1	1	0	0	1	0	1	0	1	1	1	1	1	0	1	1	1	1	0	0	0	0	0	1	1	1	1	-	1	1	1	0	1
	e364022	1	0	1	1	1	1	1	1	1	1	0	1	-	1	1	0	1	1	1	1	1	1	1	1	1	1	1	0	1	1	1	1	1	1	1	1	1	1	0	1	1	1	-	1	0	1	1	1
	e364023	0	1	1	1	0	0	0	1	0	0	1	1	-	0	1	1	1	0	0	1	1	0	0	1	1	1	1	0	1	1	1	0	1	1	0	0	0	1	0	1	0	0	-	1	0	1	0	0
	e364025	1	0	0	1	1	1	1	1	0	1	0	1	-	0	1	1	0	1	1	0	0	0	0	1	1	0	1	1	1	1	1	1	1	1	1	1	0	1	1	0	1	1	-	1	1	1	1	1
	e364026	0	1	1	1	1	1	1	1	1	1	1	1	-	0	1	0	1	1	1	1	1	1	1	1	1	1	1	1	1	0	1	1	1	1	1	1	1	0	1	1	1	1	-	1	1	1	1	1
	e364032	0	1	0	0	0	0	0	0	0	0	0	0	-	0	0	0	0	0	0	0	0	0	0	0	0	0	0	0	0	0	0	0	0	0	0	0	0	0	0	0	0	0	-	0	0	0	0	0
	e364033	1	0	1	1	0	1	0	1	1	0	1	1	-	1	1	1	1	1	0	1	0	1	1	1	0	0	1	1	1	1	1	1	1	1	1	1	1	1	1	1	1	1	-	0	1	1	1	1
	e364034	0	1	0	0	0	0	1	0	1	1	1	1	-	0	1	1	0	1	1	1	1	0	1	1	1	1	1	1	1	1	1	1	1	1	1	0	1	0	1	0	1	1	-	1	1	1	1	1
	e366208	1	0	0	0	0	-	0	0	0	0	0	0	0	0	0	0	0	0	0	0	0	0	0	0	0	0	0	0	0	0	0	0	0	0	0	0	0	0	0	0	0	0	0	0	0	0	0	0
	e373303	0	1	0	0	0	0	0	0	0	0	0	0	-	0	0	0	0	0	0	0	0	0	0	0	0	0	0	0	0	0	0	0	0	0	-	0	0	0	0	0	0	0	0	0	0	0	0	0
	e373314	0	1	1	1	1	1	1	1	1	1	1	1	-	1	1	1	1	1	1	1	1	1	1	1	1	1	1	1	1	1	1	1	1	1	-	1	1	1	1	1	1	1	1	1	1	1	1	1
	e373331	1	0	0	1	1	1	0	1	1	1	1	1	-	1	1	1	0	0	1	1	0	1	1	1	-	1	1	1	1	0	1	1	0	1	-	1	1	1	0	1	1	1	1	1	1	1	1	1
	e373333	0	1	0	0	1	0	1	0	1	1	1	0	-	0	0	0	0	1	1	1	1	0	0	1	-	1	1	0	0	0	0	1	0	1	-	0	1	0	1	0	1	1	1	1	1	1	0	0
	e373335	0	1	0	0	1	0	1	0	1	1	1	1	-	0	1	1	0	1	1	1	1	0	1	1	1	1	1	0	0	0	0	1	1	1	-	0	1	0	1	0	1	1	1	1	1	1	1	1
	e373336	1	0	1	1	1	1	1	1	1	1	0	0	-	0	0	0	0	1	1	1	0	0	0	1	0	1	1	0	1	1	1	1	0	0	-	1	1	1	0	1	1	1	0	1	0	1	0	0
	e373338	1	0	1	1	1	1	1	1	1	1	1	1	-	1	1	0	1	1	1	1	1	1	1	1	1	1	1	0	1	1	1	1	1	1	-	1	1	1	0	1	1	1	1	1	0	1	1	1
	e373339	0	1	0	0	1	1	1	0	1	1	1	1	-	1	1	1	1	1	1	1	0	1	1	1	1	1	1	1	0	1	0	0	1	1	-	0	1	0	1	1	1	1	1	1	1	1	1	0
	e373340	0	1	0	0	1	1	0	0	0	0	1	0	-	1	1	1	1	1	1	0	1	1	1	0	0	1	0	1	0	0	1	1	1	1	-	1	1	1	1	0	1	1	1	0	1	0	1	1
	e373341	1	0	1	1	0	1	0	1	1	1	1	1	-	1	1	1	1	1	0	1	0	1	1	1	0	0	1	1	1	1	1	1	1	1	-	1	1	1	1	1	1	1	1	0	1	1	1	1
	e373343	1	0	1	1	0	1	0	1	1	1	1	1	-	1	1	1	1	1	0	1	0	1	1	1	0	0	1	1	1	1	1	1	1	1	-	1	1	1	1	1	1	1	1	0	1	1	1	1
	e3733a	1	0	1	1	0	1	0	1	1	1	1	1	-	1	1	1	1	1	0	1	0	1	1	1	0	0	1	1	1	1	1	1	1	1	-	1	1	1	1	1	1	1	1	0	1	1	1	1
	e373823	0	1	0	0	1	0	1	0	1	1	1	1	-	0	-	1	0	1	1	1	1	0	1	1	1	1	1	0	0	0	0	1	1	1	-	0	1	0	1	0	1	1	-	1	1	1	1	1
	e373825	1	0	1	1	1	1	0	1	1	1	1	1	-	1	-	1	1	1	0	1	0	1	1	1	0	0	1	1	1	1	1	1	1	1	-	1	1	1	1	1	1	1	-	0	1	1	1	1
	e373826	0	1	0	0	1	1	0	0	0	0	1	1	-	1	-	1	1	1	1	0	1	1	1	0	0	1	0	1	0	0	1	1	1	1	-	1	1	1	1	0	1	1	-	0	1	0	1	1
	e373827	1	0	1	1	1	1	1	1	1	1	1	0	-	1	-	1	0	1	1	1	1	1	1	1	1	1	1	1	1	1	1	1	0	1	-	1	1	1	1	1	1	1	-	1	1	1	1	1
	e373830	0	1	0	0	1	1	0	0	0	0	1	1	-	1	-	1	1	1	1	0	1	1	1	0	0	1	0	1	0	0	1	1	1	1	-	1	1	1	1	0	1	0	-	0	1	0	1	1
	e373831	1	0	1	1	0	1	0	1	1	1	1	1	-	1	-	1	1	1	0	1	0	1	1	1	0	0	1	1	1	1	1	1	1	1	-	1	1	1	1	1	1	1	-	0	1	1	1	1
	e373832	0	1	1	1	1	0	0	1	0	0	1	1	-	0	-	1	1	0	0	0	1	0	0	0	0	0	0	0	0	1	1	0	1	1	-	0	0	1	0	1	0	0	-	1	0	1	0	0
	e374030	0	1	0	0	1	0	1	0	1	1	1	1	-	0	1	0	0	1	1	1	1	0	1	1	1	1	1	0	0	0	0	1	1	1	1	0	1	0	1	0	1	1	1	1	1	1	1	1
	e374033	0	1	0	0	1	1	0	0	1	1	1	1	-	1	1	0	1	0	0	1	0	1	0	1	1	0	1	1	1	1	0	0	1	1	1	1	1	1	1	1	1	1	0	1	1	1	1	0
	e376108	1	0	0	0	-	0	0	0	1	1	0	0	-	0	0	0	0	1	1	1	1	1	1	1	1	1	1	0	0	0	0	1	-	1	1	1	0	0	1	0	0	1	1	1	1	1	1	1
	e403213e	1	0	1	1	1	1	1	1	1	1	1	1	1	1	1	1	1	1	0	0	1	0	0	1	1	-	1	1	1	1	1	1	1	1	1	1	1	1	1	1	1	1	-	1	0	0	1	1
	e403252	0	1	0	0	1	0	1	0	1	1	1	1	1	0	1	1	0	1	1	1	1	0	1	1	1	-	1	0	0	0	0	1	1	1	1	0	1	0	1	0	1	1	-	1	1	1	1	1
	e403253	0	1	1	1	1	0	0	1	1	1	1	1	1	1	1	0	1	1	1	1	1	1	1	1	1	-	0	1	1	1	1	1	1	0	1	1	1	1	1	1	1	1	-	1	1	0	0	1
	e403256	0	1	0	0	0	1	0	0	0	0	1	1	1	1	1	1	1	1	0	0	1	1	1	0	0	-	0	1	0	0	0	1	1	0	0	1	1	1	1	0	1	1	-	0	1	0	1	1
	e403257	0	1	0	0	1	0	1	0	1	1	1	1	1	0	1	1	0	1	1	1	1	0	1	1	1	-	1	0	0	0	0	1	1	1	1	0	1	0	1	0	1	1	-	1	1	1	1	1
	e403258	0	1	0	0	1	0	1	0	1	1	1	1	1	0	1	1	1	1	1	1	1	0	1	1	1	-	1	0	0	0	0	1	1	1	1	0	1	0	1	0	1	1	-	1	1	1	1	1
	e403264	0	1	0	0	0	0	0	0	0	0	0	0	0	0	0	0	0	0	1	0	0	0	0	0	0	-	0	0	0	0	0	0	0	0	0	0	0	0	0	0	0	0	-	0	0	0	0	0
	e403265	0	1	0	0	0	0	0	0	0	0	0	0	0	0	0	0	0	0	0	0	0	0	0	0	1	-	1	0	0	0	0	0	0	0	1	0	0	0	0	0	1	0	-	1	1	1	1	1
	e403221	0	1	0	0	1	1	0	0	0	0	1	1	1	1	1	1	1	1	1	0	1	1	1	0	1	-	1	1	1	1	1	1	1	1	0	1	1	1	1	0	1	1	-	1	0	1	1	1
	e403266	0	1	0	0	1	0	1	0	1	1	1	1	1	1	1	1	1	1	1	1	1	1	1	1	1	-	1	1	1	1	0	1	1	1	1	0	1	0	0	1	0	0	-	1	1	1	1	0
	e403260	1	0	1	1	1	1	1	1	1	1	1	1	1	1	1	1	1	1	1	1	1	1	1	1	1	-	1	1	1	1	1	1	1	1	1	1	1	1	1	1	1	1	-	1	1	1	1	1
	e403261	1	0	1	1	1	1	1	1	1	1	1	1	1	1	1	1	1	1	1	1	1	1	1	1	1	-	1	1	1	1	1	1	1	1	1	1	1	1	1	1	1	1	-	1	1	0	1	1
	e403263	1	0	1	1	1	1	0	1	0	1	1	1	1	1	1	1	1	1	1	1	1	1	1	1	1	-	1	1	1	1	1	1	1	1	1	1	1	1	1	1	1	1	-	1	0	1	1	1
	e403825	1	0	1	1	1	1	1	1	1	1	1	1	1	1	1	1	1	1	1	1	-	1	1	1	1	1	1	1	1	1	1	1	-	1	1	1	1	1	1	1	1	1	-	1	1	1	1	1
	e403838	0	1	1	0	1	0	1	0	1	-	1	0	1	1	1	1	0	1	1	1	-	1	1	1	1	1	1	1	0	1	0	1	-	1	-	0	1	0	1	1	0	0	-	1	1	1	1	0
	e403839	1	0	1	1	1	1	0	1	0	-	0	1	1	1	1	1	1	1	1	1	-	1	1	1	1	1	0	1	1	1	1	1	-	1	-	1	1	1	1	1	1	1	-	1	1	1	1	1
	e403840	0	1	1	0	1	1	1	0	1	1	1	1	1	1	1	1	1	1	1	1	-	1	1	1	1	1	1	1	1	1	0	1	-	1	1	1	1	1	1	1	1	1	-	1	1	1	1	1
	e403842	0	1	1	0	1	0	1	0	1	1	1	1	1	1	1	1	1	1	1	0	-	1	1	1	1	1	1	1	0	1	0	1	-	1	1	0	1	0	1	1	0	0	-	1	-	-	0	0
	e403844	0	1	1	0	1	1	0	0	0	0	1	1	1	1	1	1	1	1	1	0	-	1	1	0	0	0	0	1	0	0	1	1	-	1	0	1	1	1	1	0	1	1	-	0	1	0	1	1
	e403845	1	0	1	1	1	1	1	1	1	1	0	1	1	1	1	0	1	1	1	1	-	1	1	1	1	1	1	0	1	1	1	1	-	1	1	1	1	1	0	1	1	1	-	1	0	1	1	1
	e403847	0	1	1	0	1	0	1	0	1	1	1	1	1	0	1	1	0	1	1	1	-	0	1	1	1	1	1	0	0	0	0	1	-	1	1	0	1	0	1	0	1	1	-	1	1	1	1	1
	e403848	1	0	1	1	0	1	0	1	1	1	1	1	1	1	1	1	1	1	1	1	-	1	1	1	1	0	1	1	1	1	1	1	-	1	1	1	1	1	1	1	1	1	-	0	1	1	1	1
	e403849	1	0	1	1	0	1	0	1	1	-	1	1	1	1	1	1	1	1	-	1	-	1	1	1	0	0	0	1	0	1	1	1	-	1	-	1	1	1	0	1	0	0	-	0	1	1	1	1
	e403850	0	1	1	0	1	1	1	0	1	1	1	1	1	1	1	0	1	1	1	1	-	1	0	1	1	0	1	1	1	1	0	0	-	1	1	1	1	1	1	1	1	0	-	1	1	1	1	1
	e403819	0	1	0	0	0	0	0	0	0	0	0	0	0	0	0	0	0	0	0	0	-	0	0	0	0	0	0	0	0	0	0	0	-	0	0	0	0	0	0	0	0	0	-	0	0	0	0	0
	e403823	0	1	0	0	0	0	0	0	0	0	0	0	0	0	0	0	0	0	0	0	-	0	0	0	0	0	0	0	0	0	0	0	-	0	0	0	0	0	0	0	0	0	-	0	0	0	0	0
	e404021	1	0	0	0	1	1	1	0	1	1	1	1	-	1	0	0	1	1	1	1	1	1	-	1	1	1	1	1	1	1	1	1	1	1	1	1	1	1	1	1	1	1	-	0	0	1	1	1
	e404022	1	0	0	1	1	0	0	1	1	0	1	1	-	1	1	1	1	1	1	1	1	1	-	1	1	1	1	1	1	1	1	1	1	1	0	1	1	1	1	1	1	1	-	1	1	0	1	1
	e404023	0	1	0	0	0	1	0	0	0	0	1	1	-	1	1	1	0	1	0	0	1	1	-	0	0	1	0	1	0	0	1	1	1	0	0	1	1	1	1	0	1	1	0	0	1	0	1	1
	e404024	1	0	1	1	1	1	1	1	1	1	0	1	-	1	1	0	1	1	1	1	1	1	-	1	1	1	1	0	1	1	1	1	1	1	1	1	1	1	0	1	1	1	0	1	0	1	1	1
	e404027	0	1	1	1	1	1	0	0	1	0	1	1	-	1	0	1	0	1	1	1	1	0	-	1	1	1	1	1	1	1	1	1	0	1	1	1	1	1	1	1	1	1	0	0	1	1	1	1
	e404030	1	0	1	1	0	1	0	1	1	1	1	1	-	1	1	1	1	1	0	1	0	1	-	1	0	0	1	1	1	1	1	1	1	1	1	1	1	1	1	1	1	1	1	0	1	1	1	1
	e404031	1	0	1	1	1	1	1	1	1	1	0	1	-	1	1	0	1	1	1	1	1	1	-	1	1	1	1	0	1	1	1	1	1	1	1	1	1	1	0	1	1	1	1	1	0	1	1	1
	e404033	0	1	1	1	1	1	1	0	1	1	1	1	-	1	1	1	1	1	1	1	1	0	-	1	1	1	1	1	1	1	1	1	1	1	1	1	1	1	1	1	1	1	1	1	1	0	0	1
	e413222	1	0	1	0	1	0	0	1	1	0	0	1	0	1	1	1	1	1	0	0	1	1	0	1	1	-	0	1	1	0	1	1	1	1	1	1	1	1	1	1	0	0	-	1	1	0	1	1
	e413236	0	1	0	0	1	0	1	0	1	1	1	1	1	0	1	1	0	1	1	1	1	0	1	1	1	-	0	0	0	0	0	1	1	1	1	0	1	0	1	0	1	1	-	1	1	1	1	1
	e413237	0	1	0	0	1	0	1	0	1	0	0	1	1	0	1	1	0	1	1	1	1	0	1	1	1	-	0	0	0	0	0	1	1	1	1	0	1	0	1	0	1	1	-	1	1	1	1	1
	e413239	1	0	1	1	1	1	1	1	1	1	1	1	1	1	1	0	1	1	1	1	0	1	1	1	1	-	1	0	1	1	1	1	1	1	1	1	1	1	0	1	1	1	-	1	0	1	1	1
	e413347	1	0	1	1	1	1	1	1	1	1	1	1	1	1	1	1	1	1	1	1	1	1	1	1	1	1	1	1	1	1	1	1	1	1	1	1	1	1	1	1	1	1	1	1	1	1	1	1
	e413348	1	0	1	1	1	1	1	1	1	1	1	1	1	1	1	1	1	1	1	1	1	1	1	1	1	1	1	1	1	1	1	1	1	1	1	1	1	1	1	1	1	1	1	1	1	1	1	1
	e413334	0	1	0	0	0	0	0	0	0	0	0	0	0	0	0	0	0	0	0	0	0	0	0	0	0	0	0	0	0	0	0	0	0	0	0	0	0	0	0	0	0	0	0	0	0	0	0	0
	e4133c	1	0	1	1	1	1	1	1	0	1	1	1	1	1	0	1	1	1	1	1	1	0	1	0	1	1	1	0	1	1	0	1	1	0	1	1	1	0	1	1	1	1	1	1	1	1	0	0
	e413319	1	0	0	0	0	0	0	0	0	0	0	0	0	0	0	0	0	0	0	0	0	0	0	0	0	0	0	0	0	0	0	0	0	0	0	0	0	0	0	0	0	0	0	0	0	0	0	0
	e413351	1	0	1	1	1	1	1	1	1	1	1	1	1	1	1	1	1	1	1	1	1	1	1	1	1	1	1	1	1	1	1	1	1	1	1	1	1	1	1	1	1	1	1	1	1	1	1	1
	e413338	1	0	1	1	1	1	1	1	1	1	1	1	1	1	1	1	0	1	1	1	1	1	1	1	0	1	0	1	1	1	1	1	1	1	0	1	1	1	1	1	1	1	0	0	1	1	1	1
	e413339	0	1	0	0	1	1	0	0	0	0	1	1	1	1	1	1	1	1	0	0	0	1	1	0	0	0	0	1	0	0	1	1	1	0	0	1	1	1	1	0	1	1	0	0	1	0	1	1
	e413341	1	0	0	1	1	1	1	1	1	1	1	1	1	1	1	1	1	1	0	1	1	1	1	1	1	0	1	1	1	1	1	1	1	1	1	1	1	1	1	1	1	1	0	1	1	1	1	1
	e413345	1	0	0	1	1	0	1	1	1	1	0	1	1	1	1	0	1	1	1	1	0	1	1	1	1	0	1	0	1	1	1	1	1	1	1	1	1	1	0	1	0	0	0	1	0	1	1	1
	e413352	0	1	0	0	1	1	0	1	0	0	1	0	1	0	1	1	0	1	0	0	0	0	0	1	1	0	0	0	0	0	1	0	0	0	0	1	1	1	0	0	0	0	0	1	1	1	0	0
	e413818	1	0	1	1	1	1	1	0	1	0	1	1	1	1	0	-	1	1	1	1	1	0	0	1	1	1	1	1	1	1	1	1	0	1	1	-	1	1	1	1	1	1	0	0	1	1	1	1
	e413824	0	1	1	0	0	1	0	1	0	0	1	0	0	0	0	-	0	0	0	0	0	0	0	1	0	0	0	0	0	0	1	0	0	0	0	-	0	0	0	1	0	1	0	1	1	1	0	0
	e413832	0	1	1	1	1	1	1	1	1	1	1	0	1	1	1	-	0	1	1	1	1	1	1	1	0	1	0	0	1	1	1	1	0	0	1	-	1	1	1	1	1	1	1	1	1	1	0	0
	e413834	0	1	1	1	1	1	1	1	0	1	1	0	1	1	1	-	0	1	1	0	1	0	0	1	1	1	1	1	0	0	0	1	1	1	1	-	1	1	1	1	1	1	1	1	0	0	0	1
	e413819	0	1	0	0	1	0	1	0	1	1	1	1	1	0	1	-	0	1	1	1	1	0	1	1	1	1	1	0	0	0	0	1	1	1	1	-	1	0	1	0	1	1	0	1	1	1	1	1
	e413841	1	0	1	1	1	1	1	1	1	1	0	1	1	1	1	-	1	1	1	1	0	1	1	1	1	1	1	0	1	1	1	1	1	1	1	-	1	1	0	1	1	1	1	1	0	1	1	1
	e413843	1	0	1	1	1	1	1	1	1	1	1	1	1	1	0	-	1	0	1	1	0	1	1	1	1	1	1	1	0	1	1	1	1	0	1	-	1	0	1	1	1	1	1	1	1	1	1	1
	e413845	0	1	1	0	0	0	1	0	1	1	1	1	1	1	0	-	1	1	1	1	1	0	0	1	1	1	1	1	1	1	0	0	1	0	1	-	1	0	1	1	1	0	1	1	1	1	1	1
	e413852	1	0	0	0	0	0	0	0	0	0	0	0	0	0	0	-	0	0	0	0	0	0	0	0	0	0	0	0	0	0	0	0	0	0	0	-	0	0	0	0	0	0	0	0	0	0	0	0
	e413849	1	0	1	1	1	1	0	1	0	1	1	1	1	1	1	-	1	1	1	1	0	1	1	1	1	0	1	1	1	1	1	1	1	1	1	-	1	1	1	1	1	1	1	0	1	1	1	1
	e413850	1	0	1	1	1	1	0	1	0	1	1	1	1	1	1	-	1	1	1	1	0	1	1	1	1	0	1	1	1	1	1	1	1	1	1	-	1	1	1	1	1	1	1	0	1	1	1	1
	e413816	0	1	1	1	1	1	1	1	1	1	1	1	1	1	1	-	1	1	1	1	1	1	1	1	1	1	1	1	1	1	1	1	1	1	1	-	1	1	1	1	1	1	1	1	1	1	1	1
	e414026	1	0	1	1	1	1	1	1	1	1	1	1	1	1	1	1	1	1	-	1	1	1	1	1	1	-	1	1	1	1	1	1	1	1	1	1	1	1	1	1	1	1	-	1	1	1	1	1
	e414032	0	1	0	0	1	1	0	-	0	0	0	0	0	0	0	1	0	0	-	0	1	0	1	0	0	-	0	1	0	1	0	0	0	0	0	0	0	0	0	0	0	0	-	0	1	0	1	1
	e414033	1	0	0	1	1	0	0	-	1	1	1	1	1	1	1	1	1	1	-	1	1	1	1	1	1	-	1	1	1	1	1	1	1	1	1	1	1	1	1	1	1	1	-	1	1	0	1	1
	e414034	1	0	1	1	1	1	0	1	0	1	1	1	1	1	1	1	1	1	-	1	0	1	1	1	1	-	1	1	1	1	1	1	1	1	1	1	1	1	1	1	1	1	-	0	1	1	1	1
	e41402a	1	0	1	1	1	1	1	-	1	1	1	1	1	1	1	1	1	1	-	1	1	1	1	1	1	-	1	1	1	1	1	1	1	1	1	1	1	1	1	1	1	1	-	1	1	1	1	1
	e423302	1	0	1	1	1	1	0	1	1	1	0	1	1	1	0	1	1	1	1	1	1	1	1	1	1	1	1	0	1	1	1	1	1	1	-	1	1	1	1	1	1	1	-	1	1	-	1	1
	e423313	0	1	0	0	0	0	0	0	0	0	0	0	0	0	0	0	0	0	0	0	0	0	0	0	0	0	0	0	0	0	0	0	0	0	0	0	0	0	0	0	0	0	-	0	0	-	0	0
	e423317	1	0	1	0	0	0	0	0	0	0	1	1	0	0	0	1	1	1	1	1	0	1	1	1	1	0	1	1	0	1	1	0	1	0	1	1	1	1	0	0	1	0	-	0	0	-	1	-
	e423332	1	0	0	0	0	0	0	0	0	0	0	0	0	0	0	0	0	0	0	0	0	0	0	0	0	0	0	0	0	0	0	0	0	0	0	0	0	0	0	0	0	0	-	0	0	-	0	0
	e423830	0	1	0	0	0	0	0	0	0	0	0	0	0	0	0	0	0	0	0	-	0	0	0	0	0	0	-	0	0	0	0	0	0	0	0	0	0	0	0	0	0	0	-	0	0	0	0	0
	e423842	0	1	1	1	0	-	1	1	1	1	1	1	1	0	1	0	0	0	0	-	1	1	1	0	1	0	-	1	1	1	1	1	1	1	0	1	1	1	1	1	1	1	-	1	1	1	1	0
	e423843	1	0	1	1	1	1	1	1	1	1	0	1	1	1	1	1	1	1	1	-	1	1	1	1	1	1	-	1	1	1	1	1	1	1	1	1	1	1	0	1	1	1	-	1	1	1	1	1
	e423845	0	1	1	1	1	1	1	1	1	1	1	1	1	1	1	1	1	1	1	-	1	1	1	1	1	1	-	1	1	0	1	1	1	1	1	1	1	1	1	1	1	1	-	1	1	0	1	1
	e423825	0	1	1	1	0	0	0	1	0	0	1	1	1	0	0	1	1	1	0	-	1	0	0	0	1	0	-	0	0	0	0	0	1	0	1	1	0	1	0	1	0	0	-	1	0	1	0	0
	e423848	1	0	1	1	1	1	1	1	1	1	0	1	1	1	1	0	1	1	1	-	0	1	1	1	1	1	-	0	1	1	1	1	1	1	1	1	1	1	0	1	1	1	-	1	0	1	1	1
	e423804	1	0	1	1	1	1	1	1	1	1	1	1	1	1	1	1	1	1	1	-	1	1	1	1	1	1	-	1	1	1	1	1	1	1	1	1	1	1	1	1	1	1	-	1	1	1	1	1
	e424047	0	1	1	0	0	1	1	0	1	-	1	1	1	1	1	0	1	1	1	1	1	1	0	1	-	1	1	1	1	1	0	1	1	0	1	1	1	1	1	1	1	0	-	1	1	1	1	1
	e4240c	1	0	1	1	1	1	1	1	1	-	1	1	1	1	1	1	1	1	1	1	1	1	1	1	-	0	1	1	1	1	1	1	1	1	1	1	1	1	1	1	1	1	-	1	1	1	1	1
	e424030	1	0	1	1	1	1	1	1	1	-	1	1	1	1	1	1	1	1	1	1	1	1	1	1	-	0	1	1	1	1	1	1	1	1	1	1	1	1	1	1	1	1	-	1	1	1	1	1
	e424048	0	1	1	1	1	1	0	0	1	-	1	1	1	0	0	1	0	1	1	1	1	0	0	1	-	1	1	1	1	1	1	1	0	1	1	1	1	1	1	1	1	0	-	1	1	1	0	0
	e424038	1	0	1	1	1	1	1	1	1	-	1	1	1	1	1	1	1	1	1	1	1	1	1	1	-	1	1	1	1	1	1	1	1	1	1	1	1	1	1	1	1	1	-	1	1	1	1	1
	e424042	1	0	1	0	1	1	1	1	1	-	0	0	1	1	1	1	0	0	1	1	0	1	0	1	-	0	1	1	1	1	1	1	0	0	1	1	1	1	1	1	0	1	-	1	1	1	1	1
	e424043	0	1	0	0	1	0	1	0	1	-	1	0	1	0	0	1	0	1	1	1	1	1	1	1	-	1	0	0	0	0	1	1	0	0	1	0	1	0	1	0	0	0	-	1	1	1	1	1
	e424044	0	1	0	0	1	1	1	0	1	-	1	1	1	1	1	1	1	1	1	1	0	1	1	1	-	1	1	1	0	1	0	0	1	1	1	1	1	0	1	1	0	0	-	1	1	1	1	0
	e424049	1	0	1	1	1	1	1	1	1	-	1	1	1	1	1	0	1	1	1	1	1	1	1	1	-	1	1	0	1	1	1	1	1	1	1	1	1	1	0	1	1	1	-	1	0	1	1	1
	e424002	1	0	0	0	0	0	0	0	0	-	0	0	0	0	0	0	0	0	0	0	0	0	0	0	-	0	0	0	0	0	0	0	0	0	0	0	0	0	0	0	0	0	-	0	0	0	0	0
A. Fricano et al.
[truncated: 98 more columns]
