# Supplementary material for: Crossability of Triticum urartu and Triticum monococcum Wheats, Homoeologous Recombination, and Description of a Panel of Interspecific Introgression Lines
Source: G3 (Bethesda). 2014 Aug 21;4(10):1931–41. doi: 10.1534/g3.114.013623 (PMC4199699; doi:10.1534/g3.114.013623)
Supplement: Supporting Information [file supp_g3.114.013623_FileS3.xls]

## Sheet: Foglio1
Chromosome	Band	Parents		B54 lines
		mono	urartu	1	2	3	4	5	6	7	8	9	10	11	12	13	14	15	16	17	18	19	20	21	22	23	24	25	26	27	28	29	30	31	32	33	34	35	36	37	38	39	40	41	42	43	44	45	46
1	m363629	0	1	0	1	0	1	1	1	1	1	-	1	0	0	-	1	0	0	-	0	1	0	1	1	1	1	1	1	1	1	1	1	1	1	1	1	1	1	1	0	1	1	1	1	1	1	1	1
1	m4133b	1	0	0	0	1	0	0	0	0	0	0	0	0	0	-	0	1	0	0	0	0	0	0	0	0	0	0	0	0	1	0	1	0	0	0	0	0	0	0	0	0	0	0	0	0	0	0	0
1	m363625	1	0	0	0	0	0	0	0	0	0	-	0	0	0	-	0	0	0	-	0	0	0	0	0	0	0	0	0	0	0	0	1	0	0	0	0	0	0	0	0	0	0	0	0	0	0	0	0
1	m364018	1	0	0	0	1	0	0	0	0	0	0	0	0	0	-	0	1	0	0	0	0	0	0	0	0	0	0	0	0	1	0	1	0	0	0	0	0	0	0	0	-	0	0	0	0	0	0	0
1	m424030	1	0	0	1	1	0	0	1	1	1	1	1	1	1	-	1	0	1	1	1	1	1	1	1	1	1	1	0	1	1	1	1	1	0	1	1	1	1	1	1	1	1	1	1	1	1	1	1
1	m403836	1	0	0	0	1	0	0	0	0	0	0	0	0	0	-	0	1	0	0	0	0	0	0	0	0	0	0	0	0	1	0	0	0	0	0	0	0	0	0	0	0	0	0	0	0	0	0	0
1	m413819	0	1	-	0	0	1	0	0	1	1	0	1	0	1	-	0	0	1	0	1	0	1	1	1	0	1	1	-	-	1	1	1	1	1	0	0	1	0	1	1	-	1	0	0	0	0	1	0
2	m413818	0	1	1	1	1	1	1	1	1	1	1	1	1	1	-	1	1	1	1	1	1	1	1	1	1	1	1	1	1	1	1	1	1	1	1	1	1	1	1	1	1	1	1	1	1	1	1	1
2	m403821	0	1	0	1	1	1	1	0	0	1	1	1	1	1	-	1	1	0	0	1	0	1	0	1	1	1	0	1	1	0	1	0	1	1	1	0	1	1	1	1	1	0	0	1	1	1	1	1
2	m374003	1	0	0	0	1	-	0	0	-	0	0	0	0	1	-	0	0	1	1	0	0	0	1	0	0	0	0	0	0	1	0	0	0	0	0	1	-	0	0	1	0	1	-	0	1	0	0	-
2	m373807	1	0	1	0	0	1	0	1	1	-	1	1	0	0	-	1	0	1	1	0	0	0	1	1	0	0	1	1	1	1	0	1	0	0	0	1	0	0	0	0	0	1	0	0	1	0	-	0
2	u364001	1	0	0	0	1	1	1	0	0	0	1	1	0	1	-	0	1	1	0	1	0	0	1	0	0	0	0	0	0	0	1	0	1	0	1	0	1	0	1	1	-	1	0	1	1	0	0	0
2	u3738b	1	0	0	0	1	1	1	0	1	0	1	1	0	1	-	0	1	1	0	1	0	1	1	0	0	0	0	0	0	1	1	1	1	0	1	0	1	0	1	0	0	1	0	1	1	0	0	0
2	m403809	1	0	0	1	1	1	1	0	1	1	1	0	0	0	-	0	1	1	1	1	0	1	1	1	0	1	0	0	0	1	1	0	0	0	1	0	1	1	1	0	1	1	0	1	1	0	0	0
2	m364009	1	0	1	1	0	0	0	1	1	1	1	0	1	1	-	1	0	1	1	1	1	1	1	1	1	1	1	1	1	1	1	1	0	1	0	1	0	1	1	1	-	1	1	0	1	1	1	1
2	m374014	0	1	0	0	1	-	0	0	-	0	0	0	0	0	-	0	1	0	0	0	0	0	0	0	0	0	0	0	0	1	0	0	0	0	0	0	-	0	0	0	0	0	0	0	0	0	0	-
2	m374015	1	0	1	1	1	1	1	1	1	1	1	1	1	1	-	1	1	1	1	1	1	1	1	1	1	1	1	1	1	1	1	1	1	1	1	1	1	1	1	1	1	1	1	1	1	1	1	1
3	u413314	0	1	0	0	0	1	1	1	-	1	0	1	0	0	-	0	0	0	0	1	0	0	0	0	1	1	1	0	1	1	0	0	0	1	0	0	1	0	0	1	1	1	0	0	0	-	0	0
3	u374008	0	1	0	0	1	-	0	1	-	1	1	0	0	0	-	1	1	1	1	1	0	0	0	0	1	0	0	0	1	1	0	0	1	1	1	0	-	0	0	0	1	1	-	1	0	1	1	-
3	u373301	0	1	1	0	0	1	0	1	1	1	1	0	0	0	-	1	1	1	1	1	0	0	0	0	1	0	0	0	1	1	0	-	1	1	1	0	1	0	0	0	1	1	0	1	0	1	1	1
3	u413307	0	1	0	0	1	1	0	1	1	1	1	0	0	0	-	1	1	1	1	1	0	0	0	0	1	0	0	0	1	1	0	1	1	1	1	0	1	0	0	0	1	1	0	1	0	1	1	0
3	u414801	0	1	0	0	1	1	0	1	1	1	1	0	0	0	-	1	1	1	-	1	0	1	0	0	1	0	0	1	1	1	0	0	1	1	1	0	1	0	1	0	1	1	0	1	0	1	1	0
3	u413304	0	1	0	0	1	1	1	1	1	1	1	0	-	-	-	1	1	1	1	1	0	1	0	0	1	1	0	0	1	1	0	1	1	1	1	0	1	0	1	1	1	1	0	1	-	1	1	0
3	m4133a	0	1	0	0	1	0	1	0	0	1	0	0	1	1	-	1	1	0	0	1	0	1	0	0	0	1	0	1	1	1	0	1	0	1	1	0	0	0	1	0	1	0	0	1	1	1	0	1
3	u413310	0	1	0	0	1	0	1	0	0	1	1	0	0	1	-	1	1	0	0	1	0	1	0	0	0	1	0	1	1	0	0	0	0	1	1	0	0	0	1	0	1	0	0	1	1	1	0	1
3	m3738a	1	0	0	1	1	1	1	1	1	-	1	1	1	0	-	1	1	1	1	1	1	1	1	1	1	1	1	1	1	1	1	-	1	1	1	1	1	1	0	1	1	1	1	1	0	1	1	0
3	m364004	0	1	1	1	1	1	1	1	1	1	-	0	0	1	-	0	1	1	1	1	0	0	1	0	0	0	1	1	0	1	0	1	1	1	1	0	1	0	1	0	-	1	1	1	0	0	1	0
3	m364001	0	1	1	1	0	-	-	1	1	1	1	1	1	1	-	1	0	1	1	1	1	1	1	1	1	0	0	1	1	0	1	0	1	1	1	1	1	1	1	0	-	1	1	1	1	1	1	1
4	m374024	1	0	1	1	0	-	1	1	-	1	1	0	1	0	-	1	0	1	1	1	1	0	1	1	0	1	0	0	0	1	0	1	0	0	0	1	-	1	1	0	1	0	1	1	1	1	1	-
4	m413334	1	0	1	0	1	0	1	0	0	1	0	0	1	1	-	1	1	0	0	1	1	1	1	1	-	1	0	1	0	1	-	1	1	0	1	0	1	0	1	1	1	0	0	1	1	1	0	1
4	m364012	1	0	1	0	1	0	0	1	0	1	1	0	1	0	-	0	1	1	0	0	0	1	1	0	0	1	0	0	0	1	0	1	1	1	1	1	1	1	0	0	-	0	0	0	1	0	1	1
4	m373316	1	0	1	0	1	0	0	1	0	0	1	0	1	0	-	0	1	1	0	0	1	0	1	1	0	1	0	1	1	1	0	-	1	1	0	1	1	1	0	0	0	0	0	0	1	0	1	1
4	u364007	1	0	1	0	1	0	0	1	0	1	1	0	1	0	-	0	1	1	0	0	0	1	1	0	0	1	0	-	0	1	0	1	1	1	1	1	1	1	0	0	-	0	0	0	1	0	1	1
4	m374010	1	0	1	0	1	-	0	1	-	0	1	0	1	0	-	0	1	1	0	0	0	0	1	0	0	1	0	0	0	1	0	1	1	1	0	1	-	1	0	1	0	0	0	0	1	0	1	-
4	m4240a	1	0	1	0	0	0	0	1	0	0	1	0	1	0	-	0	0	1	0	0	0	0	1	0	0	1	0	0	0	0	0	1	1	1	0	1	1	1	0	0	0	0	0	0	1	0	1	1
4	u364004	1	0	1	0	0	0	0	1	0	0	1	0	1	0	-	0	0	1	0	0	0	0	1	0	0	1	0	0	0	0	0	1	1	1	0	1	1	1	0	0	-	0	0	0	1	0	1	1
4	m404017	1	0	-	0	0	0	0	1	0	0	1	-	1	0	-	0	-	1	0	0	0	0	1	0	0	1	1	0	1	0	0	1	1	1	0	1	1	1	0	0	-	0	0	0	1	0	1	1
5	m413825	0	1	1	1	1	1	1	1	1	1	1	1	1	1	-	1	1	1	1	1	1	1	1	1	1	1	1	1	1	1	1	1	1	1	1	1	1	1	1	1	1	1	1	1	1	1	1	1
5	m413326	1	0	1	0	0	0	1	0	0	0	0	1	1	0	-	1	0	-	0	0	1	1	0	0	1	1	0	1	1	0	0	1	0	1	1	0	0	0	0	1	1	1	0	0	0	0	0	0
5	u373802	0	1	1	1	1	1	1	0	1	-	1	1	0	1	-	1	-	-	0	1	1	1	1	0	0	0	0	0	0	0	0	-	0	0	1	-	1	1	0	1	0	1	0	1	1	0	1	0
5	u373813	0	1	0	0	1	1	1	0	1	-	1	1	0	1	-	0	1	1	0	1	0	1	1	0	0	0	0	0	0	1	1	1	1	0	1	0	1	0	1	0	0	1	0	1	1	0	0	0
5	m404006	0	1	0	0	0	1	1	0	1	0	1	-	0	1	-	0	0	0	0	1	0	0	1	0	0	0	0	0	0	0	1	0	1	0	1	0	1	0	1	0	0	1	0	1	1	0	0	0
5	u413303	0	1	0	0	1	1	1	0	1	0	1	1	0	1	-	0	1	1	0	1	0	0	1	0	0	0	0	0	0	0	1	0	1	0	1	0	1	0	1	1	0	1	0	1	0	0	0	0
5	u374004	0	1	0	0	1	-	1	0	-	0	1	1	0	1	-	0	1	1	0	1	0	0	1	0	0	0	0	0	0	1	0	1	0	0	1	0	-	0	1	1	0	1	-	1	1	0	0	-
5	u373302	0	1	0	0	1	1	1	0	1	0	1	1	0	1	-	0	1	1	0	1	-	-	1	1	0	0	0	1	0	0	1	-	1	0	1	0	1	0	1	1	0	1	0	1	1	0	0	-
5	u413805	0	1	-	-	-	-	-	-	-	-	-	1	0	1	-	0	1	1	0	1	0	0	1	-	0	-	0	-	0	0	1	0	1	0	1	0	1	0	1	1	-	1	0	1	1	0	0	0
5	u413801	0	1	-	-	-	-	-	-	-	-	-	1	-	1	-	0	1	1	0	1	0	0	1	1	0	0	0	-	0	0	1	0	-	0	1	0	1	0	1	1	-	1	0	1	1	0	0	1
5	u373809	0	1	0	0	1	0	1	0	1	-	0	1	0	1	-	0	1	1	0	1	0	0	1	0	0	1	0	0	0	0	1	1	1	0	1	0	0	0	0	0	0	0	0	1	1	1	0	0
5	u403808	0	1	0	0	1	0	1	0	1	0	0	1	0	1	-	0	1	1	0	1	0	0	1	0	0	1	0	0	0	0	1	1	1	0	1	0	0	0	1	1	0	0	0	1	1	1	0	0
5	u373806	0	1	1	0	1	0	1	0	1	-	0	1	0	1	-	0	1	1	0	1	0	0	1	0	1	1	0	0	0	0	1	1	1	0	1	0	0	0	1	1	0	0	0	0	1	1	0	0
5	m373304	1	0	0	0	1	0	0	0	0	0	1	0	0	0	-	0	1	0	0	0	0	1	0	0	0	0	0	-	0	1	0	-	0	0	1	0	0	0	0	0	0	0	0	0	0	0	0	0
5	m4038b	0	1	0	1	1	0	1	1	1	0	0	1	1	1	-	1	1	1	1	1	1	1	1	1	1	1	1	1	-	0	1	1	-	-	0	1	1	1	1	1	1	1	1	1	1	1	1	1
5	m4138c	1	0	1	1	0	0	0	1	1	1	1	0	0	0	-	0	0	0	0	1	0	0	1	1	1	0	0	-	1	1	0	1	1	1	1	0	1	0	0	1	-	0	0	1	0	1	1	0
5	m424034	1	0	1	1	1	1	1	1	1	1	1	1	1	1	-	1	1	1	1	1	1	1	1	1	1	1	1	1	1	1	1	1	1	1	1	1	1	1	1	1	1	1	1	1	1	1	1	1
5	m403835	1	0	1	1	1	1	1	1	1	1	1	1	1	1	-	1	1	1	1	1	1	1	1	1	1	1	1	1	1	1	1	1	1	1	1	1	1	1	1	1	1	1	1	1	1	1	1	1
6	u36408	1	0	1	0	1	1	1	1	1	1	1	1	0	0	-	1	1	1	1	1	0	1	0	0	1	0	1	1	1	1	0	0	1	1	1	0	1	0	0	0	-	1	0	1	0	1	1	1
6	u373810	1	0	0	0	1	1	0	1	1	-	1	0	1	0	-	1	1	1	1	1	1	1	-	1	1	1	1	1	1	1	0	0	1	1	1	0	1	0	1	0	1	1	0	1	0	1	1	1
6	m414806	1	0	1	1	1	1	1	0	1	1	0	1	-	0	-	0	1	1	-	0	1	0	0	0	1	1	1	1	1	1	0	1	1	1	0	0	0	-	0	0	1	1	0	0	1	1	0	0
6	u40387	1	0	1	-	1	1	1	0	0	1	1	1	0	0	-	0	1	1	-	0	0	0	0	0	0	0	1	1	1	1	0	1	1	1	1	0	0	0	0	0	0	1	0	0	0	0	0	0
6	m413306	1	0	0	0	1	1	1	0	0	1	0	1	0	-	-	1	1	0	1	1	0	1	0	0	-	0	1	1	1	-	1	0	0	0	-	-	1	0	-	1	1	1	0	1	0	0	0	0
6	u36365	1	0	1	0	1	1	1	0	0	1	-	1	0	1	-	0	1	0	-	0	0	1	0	0	0	0	1	1	1	1	0	1	1	1	1	-	0	0	0	1	0	1	0	0	0	0	0	0
6	m4038a	1	0	1	0	1	1	1	0	0	1	1	1	0	0	-	0	1	0	0	0	0	1	0	0	0	0	1	1	1	1	0	1	1	1	1	0	0	0	0	0	0	1	0	0	0	0	0	0
6	m413820	1	0	-	0	1	1	1	0	0	1	0	1	1	0	-	-	1	0	0	0	0	1	0	0	0	0	1	-	0	1	-	1	1	1	1	0	0	0	0	0	-	1	0	0	0	0	0	1
6	u40389	1	0	0	0	1	1	1	0	0	1	1	1	0	0	-	0	1	0	0	0	0	1	0	0	0	0	1	1	1	1	0	0	1	1	1	0	0	0	0	0	0	1	0	0	0	0	0	0
6	u41339	1	0	1	0	1	1	1	0	0	1	1	1	0	0	-	0	1	0	0	0	0	-	0	0	0	0	1	1	1	1	0	1	1	1	1	0	0	0	0	0	0	1	0	0	0	0	0	0
6	m4038c	1	0	1	0	1	1	1	0	0	1	0	1	0	0	-	0	1	0	0	0	0	0	0	0	0	0	1	1	1	1	0	0	1	1	0	0	0	0	0	0	0	1	0	0	0	0	0	0
6	m3738b	1	0	0	0	1	0	0	0	0	0	0	0	0	0	-	0	1	0	0	0	0	1	0	0	0	0	0	0	0	1	0	1	0	0	1	0	0	0	0	0	0	0	0	0	0	0	0	0
7	u37383	1	0	0	0	0	0	0	1	0	1	1	1	1	0	-	1	1	1	0	0	0	1	0	0	1	0	0	0	1	1	1	-	1	0	1	0	0	0	1	0	1	0	1	0	0	0	0	0
7	m423806	1	0	0	0	1	0	0	1	0	1	1	1	1	0	-	1	1	1	1	1	0	0	0	0	1	0	0	0	1	1	1	0	0	0	1	0	0	0	1	0	1	0	1	0	0	0	1	1
7	m3740a	1	0	0	0	1	0	0	1	0	1	1	1	1	0	-	1	1	1	1	0	1	1	0	0	1	0	0	0	1	1	1	0	0	0	1	0	0	0	1	0	1	0	1	0	1	0	1	1
7	m414810	1	0	1	1	1	1	1	1	1	1	1	1	1	1	-	1	1	1	1	1	1	1	1	1	1	1	1	1	1	1	1	1	1	1	1	1	1	1	1	1	1	1	1	1	1	1	1	1
A. Fricano et al.
[truncated: 34 more columns]
