# Supplementary material for: Crossability of Triticum urartu and Triticum monococcum Wheats, Homoeologous Recombination, and Description of a Panel of Interspecific Introgression Lines
Source: G3 (Bethesda). 2014 Aug 21;4(10):1931–41. doi: 10.1534/g3.114.013623 (PMC4199699; doi:10.1534/g3.114.013623)
Supplement: Supporting Information [file supp_g3.114.013623_TableS1.xls]

## Sheet: Foglio1
Supplementary Table S1 Diploid wheat accessions considered for AFLP fingerprinting
		ID n°	Genebank n°	Species	Subspecies	Source	Origin
1	ae	ID26	PI 306532	T. monococcum	aegilopoides	Can/ A	Romania
2	ae	ID123	A Schgt1/88	T. monococcum	aegilopoides	DDR
3	ae	ID210	BGRC 20518	T. monococcum	aegilopoides	D	Balkan
4	ae	ID226	BGRC 36546	T. monococcum	aegilopoides	D	Balkan
5	ae	ID227	BGRC 36547	T. monococcum	aegilopoides	D	Balkan
6	ae	ID228	BGRC 36548	T. monococcum	aegilopoides	D	Balkan
7	ae	ID520	PI 272520	T. monococcum	aegilopoides	USA/ ID	Hungary
8	ae	ID521	PI 272556	T. monococcum	aegilopoides	USA/ ID	Hungary
9	ae	ID537	PI 306532	T. monococcum	aegilopoides	USA/ ID	Romania
1	B	ID49	PGR 10805	T. monococcum	boeoticum	Can/ A	Iraq/Sulaimanya
2	B	ID126	TRI 6734/89	T. monococcum	boeoticum	DDR	USSR (Armenia?)
3	B	ID379	198	T. monococcum	boeoticum	USA/ KS	Lebanon
4	B	ID386	747	T. monococcum	boeoticum	USA/ KS	Turkey
5	B	ID489	CItr 17673	T. monococcum	boeoticum	USA/ ID	Iraq/ G 2218 Iraq/ 1 km northeast of Salahadin/ 1100m
6	B	ID581	PI 401414	T. monococcum	boeoticum	USA/ ID	Iran/ D-540 Iran/ Lorestan/ Dez watershed project, 50 km southeast of Khorrama/ 1600
7	B	ID582	PI 401415	T. monococcum	boeoticum	USA/ ID	Iran/ D-541 Iran/ Lorestan/ Dez watershed project, 50 km southeast of Khorrama/ 1600
8	B	ID583	PI 401416	T. monococcum	boeoticum	USA/ ID	Iran/ D-542 Iran/ Lorestan/ Dez watershed project, 50 km southeast of Khorrama/ 1600
9	B	ID585	PI 427445	T. monococcum	boeoticum	USA/ ID	Turkey/ Tekirdağ/ 25 km west of Tekirkağ/
10	B	ID586	PI 427446	T. monococcum	boeoticum	USA/ ID	Turkey/ Ankara/ Ankara/
11	B	ID593	PI 427454	T. monococcum	boeoticum	USA/ ID	Turkey/ Malatya/ 29 km south of Malatya/ 1030
12	B	ID596	PI 427457	T. monococcum	boeoticum	USA/ ID	Turkey/ Kirsehir/ 49 km northwest of Kirsehir/ 1080
13	B	ID597	PI 427458	T. monococcum	boeoticum	USA/ ID	Turkey/ Kirsehir/ 69 km northwest of Kirsehir/ 960
14	B	ID598	PI 427459	T. monococcum	boeoticum	USA/ ID	Turkey/ Afyonkarahisar/ 125 km southwest of Afyon/ 1200
15	B	ID600	PI 427463	T. monococcum	boeoticum	USA/ ID	USSR Azerbaijan
16	B	ID601	PI 427466	T. monococcum	boeoticum	USA/ ID	USSR Ukraine/ Crimea
17	B	ID603	PI 427469	T. monococcum	boeoticum	USA/ ID	USSR Azerbaijan
18	B	ID604	PI 427470	T. monococcum	boeoticum	USA/ ID	Turkey/ Mardin/ 19.8 km west of Kiziltepe/ 620
19	B	ID609	PI 427475	T. monococcum	boeoticum	USA/ ID	Turkey/ Mardin/ 19.8 km west of Kiziltepe/ 620
20	B	ID614	PI 427480	T. monococcum	boeoticum	USA/ ID	Turkey/ Mardin/ 41.1 km west of Kiziltepe/ 600
21	B	ID621	PI 427487	T. monococcum	boeoticum	USA/ ID	Turkey/ Mardin/ 45.9 km west of Kiziltepe/ 600
22	B	ID625	PI 427491	T. monococcum	boeoticum	USA/ ID	Turkey/ Mardin/ 45.9 km west of Kiziltepe/ 600
23	B	ID628	PI 427494	T. monococcum	boeoticum	USA/ ID	Turkey/ Mardin/ 45.9 km west of Kiziltepe/ 600
24	B	ID630	PI 427496	T. monococcum	boeoticum	USA/ ID	Turkey/ Mardin/ 45.9 km west of Kiziltepe/ 600
25	B	ID634	PI 427500	T. monococcum	boeoticum	USA/ ID	Turkey/ Mardin/ 53.8 km west of Kiziltepe/ 625
26	B	ID637	PI 427503	T. monococcum	boeoticum	USA/ ID	Turkey/ Mardin/ 53.8 km west of Kiziltepe/ 625
27	B	ID640	PI 427506	T. monococcum	boeoticum	USA/ ID	Turkey/ Mardin/ 54.1 km west of Kiziltepe/ 625
28	B	ID643	PI 427509	T. monococcum	boeoticum	USA/ ID	Turkey/ Mardin/ 80.5 km west of Kiziltepe/ 670
29	B	ID649	PI 427515	T. monococcum	boeoticum	USA/ ID	Turkey/ Mardin/ 80.5 km west of Kiziltepe/ 670
30	B	ID651	PI 427517	T. monococcum	boeoticum	USA/ ID	Turkey/ Mardin/ 80.5 km west of Kiziltepe/ 670
31	B	ID656	PI 427522	T. monococcum	boeoticum	USA/ ID	Turkey/ Mardin/ 83.8 km west of Kiziltepe/ 670
32	B	ID657	PI 427523	T. monococcum	boeoticum	USA/ ID	Turkey/ Mardin/ 83.8 km west of Kiziltepe/ 670
33	B	ID660	PI 427526	T. monococcum	boeoticum	USA/ ID	Turkey/ Mardin/ 83.8 km west of Kiziltepe/ 670
34	B	ID664	PI 427530	T. monococcum	boeoticum	USA/ ID	Turkey/ Mardin/ 83.8 km west of Kiziltepe/ 670
35	B	ID666	PI 427532	T. monococcum	boeoticum	USA/ ID	Turkey/ Mardin/ 115 km west of Kiziltepe/ 800
36	B	ID669	PI 427535	T. monococcum	boeoticum	USA/ ID	Turkey/ Mardin/ 78.9 km west of Kiziltepe/ 720
37	B	ID675	PI 427541	T. monococcum	boeoticum	USA/ ID	Turkey/ Mardin/ 40.8 km east of Kiziltepe/ 650
38	B	ID682	PI 427548	T. monococcum	boeoticum	USA/ ID	Turkey/ Mardin/ 49.6 km east of Nusaybin/ 750
39	B	ID687	PI 427554	T. monococcum	boeoticum	USA/ ID	Turkey/ Mardin/ 60.5 km east of Nusaybin/ 1050
40	B	ID693	PI 427560	T. monococcum	boeoticum	USA/ ID	Turkey/ Urfa/ 2.9 km west of Viransehir/ 600
41	B	ID703	PI 427570	T. monococcum	boeoticum	USA/ ID	Turkey/ Urfa/ 25.9 km east of Urfa/ 760
42	B	ID708	PI 427575	T. monococcum	boeoticum	USA/ ID	Turkey/ Urfa/ 38.2 km east of Urfa/ 800
43	B	ID716	PI 427583	T. monococcum	boeoticum	USA/ ID	Turkey/ Urfa/ 52.5 km east of Urfa, near Hilvan/ 650
44	B	ID723	PI 427591	T. monococcum	boeoticum	USA/ ID	Turkey/ Urfa/ 52.5 km east of Urfa, near Hilvan/ 650
45	B	ID731	PI 427599	T. monococcum	boeoticum	USA/ ID	Turkey/ Urfa/ 62 to 71.9 km east of Urfa/
46	B	ID736	PI 427604	T. monococcum	boeoticum	USA/ ID	Turkey/ Urfa/ 62 to 71.9 km east of Urfa/
47	B	ID741	PI 427609	T. monococcum	boeoticum	USA/ ID	Turkey/ Urfa/ 62 to 71.9 km east of Urfa/
48	B	ID746	PI 427614	T. monococcum	boeoticum	USA/ ID	Turkey/ Urfa/ 62 to 71.9 km east of Urfa/
49	B	ID771	PI 427640	T. monococcum	boeoticum	USA/ ID	Iraq/ 1 km northeast of Salahadin/ 1100
50	B	ID775	PI 427644	T. monococcum	boeoticum	USA/ ID	Iraq/ 1 km northeast of Salahadin/ 1100
51	B	ID777	PI 427646	T. monococcum	boeoticum	USA/ ID	Iraq/ 1 km northeast of Salahadin/ 1100
52	B	ID779	PI 427648	T. monococcum	boeoticum	USA/ ID	Iraq/ 1 km northeast of Salahadin/ 1100
53	B	ID782	PI 427651	T. monococcum	boeoticum	USA/ ID	Iraq/ 1 km northeast of Salahadin/ 1100
54	B	ID784	PI 427653	T. monococcum	boeoticum	USA/ ID	Iraq/ 1 km northeast of Salahadin/ 1100
55	B	ID787	PI 427656	T. monococcum	boeoticum	USA/ ID	Iraq/ 1 km northeast of Salahadin/ 1100
56	B	ID790	PI 427659	T. monococcum	boeoticum	USA/ ID	Iraq/ 1 km northeast of Salahadin/ 1100
57	B	ID795	PI 427664	T. monococcum	boeoticum	USA/ ID	Iraq/ 1 km northeast of Salahadin/ 1100
58	B	ID797	PI 427666	T. monococcum	boeoticum	USA/ ID	Iraq/ 4 km northeast of Shaqlawa/ 1000
59	B	ID800	PI 427669	T. monococcum	boeoticum	USA/ ID	Iraq/ 4 km northeast of Shaqlawa/ 1000
60	B	ID803	PI 427672	T. monococcum	boeoticum	USA/ ID	Iraq/ 4 km northeast of Shaqlawa/ 1000
61	B	ID807	PI 427676	T. monococcum	boeoticum	USA/ ID	Iraq/ 21 km south of Harir/ 1000
62	B	ID815	PI 427684	T. monococcum	boeoticum	USA/ ID	Iraq/ 21 km south of Harir/ 1000
63	B	ID818	PI 427688	T. monococcum	boeoticum	USA/ ID	Iraq/ 21 km west of Shaqlawa/ 1000
64	B	ID821	PI 427691	T. monococcum	boeoticum	USA/ ID	Iraq/ 13 km west of Shaqlawa/ 1000
65	B	ID824	PI 427694	T. monococcum	boeoticum	USA/ ID	Iraq/ 13 km west of Shaqlawa/ 1000
66	B	ID827	PI 427697	T. monococcum	boeoticum	USA/ ID	Iraq/ 13 km west of Shaqlawa/ 1000
67	B	ID830	PI 427700	T. monococcum	boeoticum	USA/ ID	Iraq/ 13 km west of Shaqlawa/ 1000
68	B	ID834	PI 427704	T. monococcum	boeoticum	USA/ ID	Iraq/ 13 km west of Shaqlawa/ 1000
69	B	ID839	PI 427709	T. monococcum	boeoticum	USA/ ID	Iraq/ 13 km west of Shaqlawa/ 1000
70	B	ID840	PI 427710	T. monococcum	boeoticum	USA/ ID	Iraq/ 5.5 km north of Dohuk/ 750
71	B	ID843	PI 427713	T. monococcum	boeoticum	USA/ ID	Iraq/ 5.5 km north of Dohuk/ 750
72	B	ID862	PI 427733	T. monococcum	boeoticum	USA/ ID	Iraq/ 24 km northeast of Dohuk/ 950
73	B	ID864	PI 427735	T. monococcum	boeoticum	USA/ ID	Iraq/ 2 km west of Suara Tuka/ 1250
74	B	ID868	PI 427739	T. monococcum	boeoticum	USA/ ID	Iraq/ 2 km west of Suara Tuka/ 1250
75	B	ID870	PI 427741	T. monococcum	boeoticum	USA/ ID	Iraq/ 6 km east of Suara Tuka/ 1050
76	B	ID871	PI 427742	T. monococcum	boeoticum	USA/ ID	Iraq/ 6 km east of Suara Tuka/ 1050
77	B	ID875	PI 427747	T. monococcum	boeoticum	USA/ ID	Iraq/ between Zawita and Suara Tuka/
78	B	ID895	PI 427768	T. monococcum	boeoticum	USA/ ID	Iraq/ between Zawita and Suara Tuka/
79	B	ID906	PI 427779	T. monococcum	boeoticum	USA/ ID	Iraq/ 44 km northwest of Sulaimaniya/ 700
80	B	ID907	PI 427780	T. monococcum	boeoticum	USA/ ID	Iraq/ 44 km northwest of Sulaimaniya/ 700
81	B	ID910	PI 427783	T. monococcum	boeoticum	USA/ ID	Iraq/ 25 km east of Sulaimaniya/ 960
82	B	ID923	PI 427796	T. monococcum	boeoticum	USA/ ID	Iran/ 34 km east of Kamiaran/ 1900
83	B	ID925	PI 427798	T. monococcum	boeoticum	USA/ ID	Iran/ 34 km east of Kamiaran/ 1900
84	B	ID935	PI 427808	T. monococcum	boeoticum	USA/ ID	Iran/ Bakhtaran/ 9 km northwest of Kermanshah/ 1400
85	B	ID936	PI 427809	T. monococcum	boeoticum	USA/ ID	Iran/ 36 km northwest of Shahabad/
86	B	ID938	PI 427811	T. monococcum	boeoticum	USA/ ID	Iran/ 6 km south of Shahabad/ 1500
87	B	ID939	PI 427812	T. monococcum	boeoticum	USA/ ID	Iran/ 6 km south of Shahabad/ 1500
88	B	ID941	PI 427814	T. monococcum	boeoticum	USA/ ID	Iran/ 6 km south of Shahabad/ 1500
89	B	ID944	PI 427817	T. monococcum	boeoticum	USA/ ID	Iraq/ 1 km northeast of Salahadin/ 1100
90	B	ID947	PI 427820	T. monococcum	boeoticum	USA/ ID	Iraq/ 1 km northeast of Salahadin/ 1100
91	B	ID953	PI 427826	T. monococcum	boeoticum	USA/ ID	Iraq/ 1 km northeast of Salahadin/ 1100
92	B	ID956	PI 427829	T. monococcum	boeoticum	USA/ ID	Iraq/ 1 km northeast of Salahadin/ 1100
93	B	ID960	PI 427833	T. monococcum	boeoticum	USA/ ID	Iraq/ 1 km northeast of Salahadin/ 1100
94	B	ID963	PI 427836	T. monococcum	boeoticum	USA/ ID	Iraq/ 1 km northeast of Salahadin/ 1100
95	B	ID965	PI 427838	T. monococcum	boeoticum	USA/ ID	Iraq/ 2 km northwest of Salahadin/ 1100
96	B	ID968	PI 427841	T. monococcum	boeoticum	USA/ ID	Iraq/ 2 km northwest of Salahadin/ 1100
97	B	ID972	PI 427845	T. monococcum	boeoticum	USA/ ID	Iraq/ 4 km northeast of Shaqlawa/ 1000
98	B	ID974	PI 427847	T. monococcum	boeoticum	USA/ ID	Iraq/ 4 km northeast of Shaqlawa/ 1000
99	B	ID977	PI 427850	T. monococcum	boeoticum	USA/ ID	Iraq/ 7 km northeast of Shaqlawa/ 1000
100	B	ID979	PI 427852	T. monococcum	boeoticum	USA/ ID	Iraq/ 7 km northeast of Shaqlawa/ 1000
101	B	ID982	PI 427855	T. monococcum	boeoticum	USA/ ID	Iraq/ 21 km south of Harir/ 1000
102	B	ID986	PI 427859	T. monococcum	boeoticum	USA/ ID	Iraq/ 21 km south of Harir/ 1000
103	B	ID990	PI 427863	T. monococcum	boeoticum	USA/ ID	Iraq/ 21 km south of Harir/ 1000
104	B	ID995	PI 427868	T. monococcum	boeoticum	USA/ ID	Iraq/ 13 km west of Shaqlawa/ 1000
105	B	ID999	PI 427872	T. monococcum	boeoticum	USA/ ID	Iraq/ 13 km west of Shaqlawa/ 1000
106	B	ID1002	PI 427875	T. monococcum	boeoticum	USA/ ID	Iraq/ 13 km west of Shaqlawa/ 1000
107	B	ID1008	PI 427881	T. monococcum	boeoticum	USA/ ID	Iraq/ 5.5 km north of Dohuk/ 750
108	B	ID1011	PI 427884	T. monococcum	boeoticum	USA/ ID	Iraq/ 5.5 km north of Dohuk/ 750
109	B	ID1013	PI 427886	T. monococcum	boeoticum	USA/ ID	Iraq/ 5.5 km north of Dohuk/ 750
110	B	ID1017	PI 427890	T. monococcum	boeoticum	USA/ ID	Iraq/ 5.5 km north of Dohuk/ 750
111	B	ID1020	PI 427893	T. monococcum	boeoticum	USA/ ID	Iraq/ 5.5 km north of Dohuk/ 750
112	B	ID1023	PI 427896	T. monococcum	boeoticum	USA/ ID	Iraq/ 24 km northeast of Dohuk/ 950
113	B	ID1027	PI 427900	T. monococcum	boeoticum	USA/ ID	Iraq/ 24 km northeast of Dohuk/ 950
114	B	ID1030	PI 427903	T. monococcum	boeoticum	USA/ ID	Iraq/ 24 km northeast of Dohuk/ 950
115	B	ID1033	PI 427906	T. monococcum	boeoticum	USA/ ID	Iraq/ 24 km northeast of Dohuk/ 950
116	B	ID1037	PI 427910	T. monococcum	boeoticum	USA/ ID	Iraq/ 2 km west of Suara Tuka/ 1250
117	B	ID1040	PI 427913	T. monococcum	boeoticum	USA/ ID	Iraq/ 2 km west of Suara Tuka/ 1250
118	B	ID1042	PI 427915	T. monococcum	boeoticum	USA/ ID	Iraq/ 2 km west of Suara Tuka/ 1250
119	B	ID1055	PI 427929	T. monococcum	boeoticum	USA/ ID	Iraq/ 25 km northwest of Sulaimaniya/ 800
120	B	ID1057	PI 427931	T. monococcum	boeoticum	USA/ ID	Iraq/ 25 km northwest of Sulaimaniya/ 800
121	B	ID1058	PI 427932	T. monococcum	boeoticum	USA/ ID	Iraq/ 12 km south of Sulaimaniya/
122	B	ID1059	PI 427933	T. monococcum	boeoticum	USA/ ID	Iraq/ 12 km south of Sulaimaniya/
123	B	ID1060	PI 427934	T. monococcum	boeoticum	USA/ ID	Iraq/ 14 km south of Sulaimaniya/ 850
124	B	ID1062	PI 427936	T. monococcum	boeoticum	USA/ ID	Iraq/ 1 km northeast of Salahadin/ 1100
125	B	ID1066	PI 427940	T. monococcum	boeoticum	USA/ ID	Iraq/ 21 km south of Harir, between Rowandus and Shaqlaw/ 1000
126	B	ID1068	PI 427942	T. monococcum	boeoticum	USA/ ID	Iraq/ between Zawita and Suara Tuka/
127	B	ID1072	PI 427946	T. monococcum	boeoticum	USA/ ID	Iraq/ 21 km south of Harir, between Rowandus and Shaqlaw/ 1000
128	B	ID1074	PI 427948	T. monococcum	boeoticum	USA/ ID	Iraq/ 13 km west of Shaqlawa/ 1000
129	B	ID1075	PI 427949	T. monococcum	boeoticum	USA/ ID	Iraq/ 13 km west of Shaqlawa/ 1000
130	B	ID1078	PI 427952	T. monococcum	boeoticum	USA/ ID	Iraq/ 13 km west of Shaqlawa/ 1000
131	B	ID1084	PI 427958	T. monococcum	boeoticum	USA/ ID	Iraq/ 13 km west of Shaqlawa/ 1000
132	B	ID1087	PI 427961	T. monococcum	boeoticum	USA/ ID	Iraq/ 25 km northwest of Sulaimaniya on Roddto Dokhar/ 800
133	B	ID1089	PI 427963	T. monococcum	boeoticum	USA/ ID	Turkey/ Van/ Van/
134	B	ID1093	PI 427967	T. monococcum	boeoticum	USA/ ID	Turkey/ Mardin/ Mardin/
135	B	ID1095	PI 427969	T. monococcum	boeoticum	USA/ ID	Turkey/ Diyarbakir/ Silvan/
136	B	ID1097	PI 427973	T. monococcum	boeoticum	USA/ ID	Turkey/ Kirsehir/ Kaman/
137	B	ID1099	PI 427975	T. monococcum	boeoticum	USA/ ID	Turkey/ Siirt/ Kurtala/
138	B	ID1100	PI 427976	T. monococcum	boeoticum	USA/ ID	Turkey/ Gaziantep/ Islahiye/
139	B	ID1106	PI 427983	T. monococcum	boeoticum	USA/ ID	Turkey/ Mardin/ Cizre/
140	B	ID1107	PI 427984	T. monococcum	boeoticum	USA/ ID	Turkey/ Siirt/ Sirnak/
141	B	ID1108	PI 427985	T. monococcum	boeoticum	USA/ ID	Turkey/ Cankiri/ Cerkes/
142	B	ID1109	PI 427986	T. monococcum	boeoticum	USA/ ID	Turkey/ Antalya/ Elmali/
143	B	ID1110	PI 427987	T. monococcum	boeoticum	USA/ ID	Turkey/ Niğde/ Ulukişla/
144	B	ID1111	PI 427988	T. monococcum	boeoticum	USA/ ID	Turkey/ Isparta/ Yalvao/
145	B	ID1113	PI 427990	T. monococcum	boeoticum	USA/ ID	Lebanon/ between Kfarkouk and Aiha/
146	B	ID1114	PI 427991	T. monococcum	boeoticum	USA/ ID	Lebanon/ between Kfarkouk and Aiha/
147	B	ID1115	PI 427992	T. monococcum	boeoticum	USA/ ID	Lebanon/ between Kfarkouk and Aiha/
148	B	ID1116	PI 427993	T. monococcum	boeoticum	USA/ ID	Lebanon/ between Kfarkouk and Aiha/
149	B	ID1117	PI 427995	T. monococcum	boeoticum	USA/ ID	Lebanon/ between Kfarkouk and Aiha/
150	B	ID1118	PI 427996	T. monococcum	boeoticum	USA/ ID	Lebanon/ between Kfarkouk and Aiha/
151	B	ID1119	PI 427997	T. monococcum	boeoticum	USA/ ID	Lebanon/ between Kfarkouk and Aiha/
152	B	ID1120	PI 427998	T. monococcum	boeoticum	USA/ ID	Lebanon/ between Kfarkouk and Aiha/
153	B	ID1121	PI 427999	T. monococcum	boeoticum	USA/ ID	Lebanon/ between Kfarkouk and Aiha/
154	B	ID1123	PI 428001	T. monococcum	boeoticum	USA/ ID	Lebanon/ between Kfarkouk and Aiha/
155	B	ID1124	PI 428002	T. monococcum	boeoticum	USA/ ID	Lebanon/ between Kfarkouk and Aiha/
156	B	ID1125	PI 428003	T. monococcum	boeoticum	USA/ ID	Turkey/ Ankara/ 10 km west of Ankara/
157	B	ID1131	PI 428009	T. monococcum	boeoticum	USA/ ID	USSR Azerbaijan/ southeast of Banazur, near Urdahli/
158	B	ID1141	PI 470718	T. monococcum	boeoticum	USA/ ID	Turkey/ Nevsehir/ 9 km southeast of Urgup/ 1200
159	B	ID1142	PI 470722	T. monococcum	boeoticum	USA/ ID	Turkey/ Kayseri/ 10 km northeast of Pinarbasi/ 1510
160	B	ID1143	PI 470723	T. monococcum	boeoticum	USA/ ID	Turkey/ Kayseri/ 46 km northeast of Pinarbasi/ 1770
161	B	ID1144	PI 470726	T. monococcum	boeoticum	USA/ ID	Turkey/ Elaziğ/ 25 km southwest of Elaziğ/ 1160 m asl
162	B	ID1148	PI 503302	T. monococcum	boeoticum	USA/ ID	Turkey/ Mardin/ 116 km west of Kiziltepe/ 800
163	B	ID1150	PI 503304	T. monococcum	boeoticum	USA/ ID	Turkey/ Urfa/ 52.5 km east of Urfa, near Hilvan/ 650
164	B	ID1151	PI 503305	T. monococcum	boeoticum	USA/ ID	Iraq/ 1 km northeast of Salahadin/ 1100
165	B	ID1153	PI 503307	T. monococcum	boeoticum	USA/ ID	Iraq/24 km northeast of Dohuk/ 950
166	B	ID1156	PI 503578	T. monococcum	boeoticum	USA/ ID	Iran/ 47 km northwest of Shahabad/ 1500
167	B	ID1161	PI 538527	T. monococcum	boeoticum	USA/ ID	Turkey/ Mardin/ 80.5 km west of Kiziltepe/ 670
168	B	ID1166	PI 538532	T. monococcum	boeoticum	USA/ ID	Turkey/ Urfa/ 2.9 km south of Viransehir/ 600
169	B	ID1170	PI 538536	T. monococcum	boeoticum	USA/ ID	Turkey/ Urfa/ 52.5 km east of Urfa, near Hilvan/ 650
170	B	ID1179	PI 538545	T. monococcum	boeoticum	USA/ ID	Iraq/ 2 km northwest of Salahadin/ 1100
171	B	ID1181	PI 538547	T. monococcum	boeoticum	USA/ ID	Iraq/ 4 km northeast of Shaqlawa/ 1000
172	B	ID1182	PI 538548	T. monococcum	boeoticum	USA/ ID	Iraq/ 4 km northeast of Shaqlawa/ 1000
173	B	ID1187	PI 538553	T. monococcum	boeoticum	USA/ ID	Iraq/ 13 km west of Shaqlawa/ 1000
174	B	ID1190	PI 538556	T. monococcum	boeoticum	USA/ ID	Iraq/ 5.5 km north of Dohuk/ 750
175	B	ID1194	PI 538560	T. monococcum	boeoticum	USA/ ID	Iraq/ 24 km northeast of Dohuk towards Amadiya/ 950
176	B	ID1196	PI 538562	T. monococcum	boeoticum	USA/ ID	Iraq/ 2 km west of Suara Tuka/ 1250
177	B	ID1199	PI 538565	T. monococcum	boeoticum	USA/ ID	Iraq/ 6 km east of Suara Tuka/ 1050
178	B	ID1201	PI 538567	T. monococcum	boeoticum	USA/ ID	Iraq/ 6 km east of Suara Tuka/ 1050
179	B	ID1204	PI 538570	T. monococcum	boeoticum	USA/ ID	Iraq/ between Zawita and Suara Tuka/
180	B	ID1207	PI 538573	T. monococcum	boeoticum	USA/ ID	Iraq/ between Zawita and Suara Tuka/
181	B	ID1210	PI 538576	T. monococcum	boeoticum	USA/ ID	Iran/ Bakhtaran/ 5.5 km north of Bisotun/ 1350
182	B	ID1211	PI 538577	T. monococcum	boeoticum	USA/ ID	Iran/ Bakhtaran/ 5.5 km north of Bisotun/ 1350
183	B	ID1213	PI 538579	T. monococcum	boeoticum	USA/ ID	Iraq/ 1 km northeast of Salahadin/ 1100
184	B	ID1215	PI 538581	T. monococcum	boeoticum	USA/ ID	Iraq/ 1 km northeast of Salahadin/ 1100
185	B	ID1220	PI 538586	T. monococcum	boeoticum	USA/ ID	Iraq/ 21 km south of Harir/ 1000
186	B	ID1221	PI 538587	T. monococcum	boeoticum	USA/ ID	Iraq/ 21 km south of Harir/ 1000
187	B	ID1222	PI 538588	T. monococcum	boeoticum	USA/ ID	Iraq/ 13 km west of Shaqlawa/ 1000
188	B	ID1225	PI 538591	T. monococcum	boeoticum	USA/ ID	Iraq/ 13 km west of Shaqlawa/ 1000
189	B	ID1228	PI 538594	T. monococcum	boeoticum	USA/ ID	Iraq/ 13 km west of Shaqlawa/ 1000
190	B	ID1231	PI 538597	T. monococcum	boeoticum	USA/ ID	Iraq/ 13 km west of Shaqlawa/ 1000
191	B	ID1235	PI 538601	T. monococcum	boeoticum	USA/ ID	Iraq/ 6 km east of Suara Tuka/ 1050
192	B	ID1238	PI 538604	T. monococcum	boeoticum	USA/ ID	Iraq/ 6 km east of Suara Tuka/ 1050
193	B	ID1239	PI 538605	T. monococcum	boeoticum	USA/ ID	Iraq/ 43 km northwest of Sulaimaniya near Surdash/ 800
194	B	ID1240	PI 538606	T. monococcum	boeoticum	USA/ ID	Iraq/ 12 km south of Sulaimaniya/
195	B	ID1241	PI 538607	T. monococcum	boeoticum	USA/ ID	Turkey/ Urfa/ 2.9 km south of Viransehir/ 600
196	B	ID1245	PI 538611	T. monococcum	boeoticum	USA/ ID	Iraq/ 1 km northeast of Salahadin/ 1100
197	B	ID1247	PI 538613	T. monococcum	boeoticum	USA/ ID	Iraq/ 2 km west of Suara Tuka/ 1250
198	B	ID1250	PI 538616	T. monococcum	boeoticum	USA/ ID	Iraq/ 13 km west of Shaqlawa/ 1000
199	B	ID1252	PI 538619	T. monococcum	boeoticum	USA/ ID	Turkey/ Yozgat/ 48 km southeast of Sorgun/ 1100
200	B	ID1258	PI 538625	T. monococcum	boeoticum	USA/ ID	Turkey/ Denizli/ Acipayam? (I.D. no. TR 035465)/ 1160
201	B	ID1265	PI 554480	T. monococcum	boeoticum	USA/ ID	Turkey/ Gaziantep/ 1 km south of Araban village: 25 km north of Yavuz/ 550
202	B	ID1271	PI 554487	T. monococcum	boeoticum	USA/ ID	Turkey/ Diyarbakir/ 8 km southwest of Dicle/ 950
203	B	ID1273	PI 554491	T. monococcum	boeoticum	USA/ ID	Turkey/ Urfa/ 3 km north of Hilvan/ 600
204	B	ID1274	PI 554493	T. monococcum	boeoticum	USA/ ID	Turkey/ Urfa/ 3 km southwest of Hilvan/ 600
205	B	ID1279	PI 554503	T. monococcum	boeoticum	USA/ ID	Turkey/ Diyarbakir/ At spring, 7 km south of Cinar (south of Diyarbakir)/ 625
206	B	ID1283	PI 554508	T. monococcum	boeoticum	USA/ ID	Turkey/ Urfa/ 5 km northwest of Urfa-Diyarbakir road junction/ 500
207	B	ID1289	PI 554521	T. monococcum	boeoticum	USA/ ID	Turkey/ Izmir/ 0.5 km east of Aliaga: east edge of village/ 60
208	B	ID1290	PI 554522	T. monococcum	boeoticum	USA/ ID	Turkey/ Izmir/ 0.5 km east of Aliaga: east edge of village/ 60
209	B	ID1291	PI 554523	T. monococcum	boeoticum	USA/ ID	Turkey/ Canakkale/ 7 km northeast of Canakkale on route to Lapseki/ 80
210	B	ID1292	PI 554525	T. monococcum	boeoticum	USA/ ID	Turkey/ Bursa/ 11 km north of Yenisehir/ 370
211	B	ID1294	PI 554531	T. monococcum	boeoticum	USA/ ID	Turkey/ Cankiri/ 8 km east of Cerkes/ 1000
212	B	ID1295	PI 554532	T. monococcum	boeoticum	USA/ ID	Turkey/ Cankiri/ 19 km south of Cankiri/ 710
213	B	ID1296	PI 554533	T. monococcum	boeoticum	USA/ ID	Turkey/ Ankara/ 12 km northeast of Ankara City limit sign/ 900
214	B	ID1297	PI 554535	T. monococcum	boeoticum	USA/ ID	Turkey/ Ankara/ 5 km east of Ankara City limit sign/ 575
215	B	ID1299	PI 554537	T. monococcum	boeoticum	USA/ ID	Turkey/ Ankara/ 40 km southwest of Ankara: 3.5 km north of Haymana along Haymana road/ 1100
216	B	ID1300	PI 554538	T. monococcum	boeoticum	USA/ ID	Turkey/ Ankara/ 8.5 km north of Haymana station/ 1100
217	B	ID1301	PI 554539	T. monococcum	boeoticum	USA/ ID	Turkey/ Ankara/ 8.5 km north of Haymana station/
218	B	ID1303	PI 554542	T. monococcum	boeoticum	USA/ ID	Turkey/ Ankara/ 25 km south of Golbasi/ 820
219	B	ID1304	PI 554543	T. monococcum	boeoticum	USA/ ID	Turkey/ Konya/ 32 km west of Konya/ 1450
220	B	ID1305	PI 554544	T. monococcum	boeoticum	USA/ ID	Turkey/ Konya/ 27 km northeast of Beysehir/ 1250
221	B	ID1306	PI 554545	T. monococcum	boeoticum	USA/ ID	Turkey/ Konya/ 6 km southwest of Beysehir/ 1150
222	B	ID1307	PI 554546	T. monococcum	boeoticum	USA/ ID	Turkey/ Konya/ 5 km north of Beysehir/ 1125
223	B	ID1308	PI 554547	T. monococcum	boeoticum	USA/ ID	Turkey/ Konya/ 5 km north of Beysehir/ 1125
224	B	ID1309	PI 554548	T. monococcum	boeoticum	USA/ ID	Turkey/ Konya/ 5 km north of Beysehir/ 1125
225	B	ID1310	PI 554550	T. monococcum	boeoticum	USA/ ID	Turkey/ Konya/ 5 km north of Beysehir/ 1125
226	B	ID1311	PI 554551	T. monococcum	boeoticum	USA/ ID	Turkey/ Konya/ 18 km north of Beysehir/ 1120
227	B	ID1312	PI 554556	T. monococcum	boeoticum	USA/ ID	Turkey/ Isparta/ 1.5 km northwest of Egridir/ 850
228	B	ID1313	PI 554557	T. monococcum	boeoticum	USA/ ID	Turkey/ Burdur/ 11 km northeast of Yesilova/ 1310
229	B	ID1314	PI 554558	T. monococcum	boeoticum	USA/ ID	Turkey/ Burdur/ 11 km northeast of Yesilova/ 1310
230	B	ID1315	PI 554559	T. monococcum	boeoticum	USA/ ID	Turkey/ Burdur/ 11 km northeast of Yesilova/ 1310
231	B	ID1316	PI 554560	T. monococcum	boeoticum	USA/ ID	Turkey/ Denizli/ 32 km south of Denizli, junction to Tavas/ 1230
232	B	ID1317	PI 554561	T. monococcum	boeoticum	USA/ ID	Turkey/ Kirsehir/ 10 km southeast of Ankara-Kirsehir province border/ 825
233	B	ID1318	PI 554562	T. monococcum	boeoticum	USA/ ID	Turkey/ Kirsehir/ 12 km northwest of Kirsehir/ 1000
234	B	ID1319	PI 554565	T. monococcum	boeoticum	USA/ ID	Turkey/ Kayseri/ 12 km west of Bunya/ 1225
235	B	ID1320	PI 554566	T. monococcum	boeoticum	USA/ ID	Turkey/ Kayseri/ 6 km northeast of Pinarbasi/ 1510
236	B	ID1321	PI 554571	T. monococcum	boeoticum	USA/ ID	Turkey/ Elaziğ/ 1 km east of Arapkir-Elaziğ-Malatya jct. toward El/ 1000
237	B	ID1323	PI 554573	T. monococcum	boeoticum	USA/ ID	Turkey/ Elazig/ 5 km east of Tunceli-Bingol junction/ 900
238	B	ID1325	PI 554575	T. monococcum	boeoticum	USA/ ID	Turkey/ Van/ 6 km southeast of Van/ 1990
239	Bk	ID590	PI 427451	T. monococcum	boeoticum	USA/ ID	Turkey/ Diyarbakir/ 60 km west of Diyarbakir/ 1300
240	Bk	ID751	PI 427619	T. monococcum	boeoticum	USA/ ID	Turkey/ Urfa/ 16 km east of Siverek/ 1050
241	Bk	ID752	PI 427620	T. monococcum	boeoticum	USA/ ID	Turkey/ Urfa/ 16 km east of Siverek/ 1050
242	Bk	ID753	PI 427621	T. monococcum	boeoticum	USA/ ID	Turkey/ Urfa/ 20.2 km east of Siverek/ 1200
243	Bk	ID754	PI 427622	T. monococcum	boeoticum	USA/ ID	Turkey/ Diyarbakir/ 52.5 km west of Diyarbakir in the Karakadaj/ 1400
244	Bk	ID755	PI 427624	T. monococcum	boeoticum	USA/ ID	Turkey/ Diyarbakir/ 52.5 km west of Diyarbakir in the Karakadaj/ 1400
245	Bk	ID758	PI 427627	T. monococcum	boeoticum	USA/ ID	Turkey/ Diyarbakir/ 52.5 km west of Diyarbakir in the Karakadaj/ 1400
246	Bk	ID760	PI 427629	T. monococcum	boeoticum	USA/ ID	Turkey/ Urfa/ 20.2 km east of Siverek/ 1200
247	Bk	ID763	PI 427632	T. monococcum	boeoticum	USA/ ID	Turkey/ Urfa/ 20.2 km east of Siverek/ 1200
248	Bk	ID765	PI 427634	T. monococcum	boeoticum	USA/ ID	Turkey/ Urfa/ 20.2 km east of Siverek/ 1200
249	Bk	ID766	PI 427635	T. monococcum	boeoticum	USA/ ID	Turkey/ Urfa/ 20.2 km east of Siverek/ 1200
250	Bk	ID767	PI 427636	T. monococcum	boeoticum	USA/ ID	Turkey/ Urfa/ 20.2 km east of Siverek/ 1200
251	Bk	ID1174	PI 538540	T. monococcum	boeoticum	USA/ ID	Turkey/ Diyarbakir/ 52.5 km west of Diyarbakir in the Karacadag/ 1400
252	Bk	ID1175	PI 538541	T. monococcum	boeoticum	USA/ ID	Turkey/ Urfa/ 20.2 km east of Siverek/ 1200
253	Bk	ID1272	PI 554488	T. monococcum	boeoticum	USA/ ID	Turkey/ Urfa/ 28 km east of Siverek/ 1050
254	Bk	ID1280	PI 554504	T. monococcum	boeoticum	USA/ ID	Turkey/ Urfa/ 20 km southeast of Siverek/ 450
255	Bk	ID1281	PI 554505	T. monococcum	boeoticum	USA/ ID	Turkey/ Urfa/ 20 km southeast of Siverek/ 450
1	M	ID4	PI 94740	T. monococcum	monococcum	Can/ A	Spain, Valki Experimental Station
2	M	ID5	PI 119435	T. monococcum	monococcum	Can/ A	Turkey/ Samsun, 20 km west
3	M	ID7	PI 167615	T. monococcum	monococcum	Can/ A	Turkey/ Balikesir/ Okcugerli
4	M	ID8	PI 167625	T. monococcum	monococcum	Can/ A	Turkey/ Balikesir/ Bandirma
5	M	ID14	PI 254195	T. monococcum	monococcum	Can/ A	Turkey/ Ankara/ Yenisehir
6	M	ID15	PI 264935	T. monococcum	monococcum	Can/ A	Greece/ Crete/ Mesava Plain E
7	M	ID69	G 4325	T. monococcum	monococcum conv. sinskajae	Can/ A	Turkey
8	M	ID102	Atri 612/74 SKL	T. monococcum	monococcum	DDR	Balkan
9	M	ID104	Atri 618/74 SKL	T. monococcum	monococcum	DDR	Balkan
10	M	ID109	Atri 1990/74 SKL	T. monococcum	monococcum	DDR	Albania
11	M	ID115	Atri 3637/74 SKL	T. monococcum	monococcum	DDR	Hungary
12	M	ID120	Atri 11525/76 SKL	T. monococcum	monococcum conv. sinskajae	DDR	Turkey
13	M	ID127	AT12910/89	T. monococcum	monococcum conv. sinskajae	DDR	Turkey
14	M	ID137	BGRC 3521	T. monococcum	monococcum	D	Albania
15	M	ID152	BGRC 7038	T. monococcum	monococcum	D	Germany
16	M	ID187	BGRC 13182	T. monococcum	monococcum	D	Italy
17	M	ID189	BGRC 13187	T. monococcum	monococcum	D	Balkan
18	M	ID190	BGRC 13189	T. monococcum	monococcum	D	Balkan
19	M	ID194	BGRC 13193	T. monococcum	monococcum	D	Austria
20	M	ID197	BGRC 13196	T. monococcum	monococcum	D	Austria
21	M	ID209	BGRC 20451	T. monococcum	monococcum	D	Balkan
22	M	ID211	BGRC 20521	T. monococcum	monococcum	D	Balkan
23	M	ID233	BGRC 36556	T. monococcum	monococcum	D	Bulgaria
24	M	ID259	BGRC 37351	T. monococcum	monococcum	D	Germany
25	M	ID269	BGRC 42006	T. monococcum	monococcum	D	Sweden
26	M	ID279	BGRC 42016	T. monococcum	monococcum	D	Balkan
27	M	ID280	BGRC 42017	T. monococcum	monococcum	D	Albania
28	M	ID282	BGRC 42019	T. monococcum	monococcum	D	Spain
29	M	ID303	BGRC 43448	T. monococcum	monococcum	D	France
30	M	ID306	BGRC 43451	T. monococcum	monococcum	D	Balkan
31	M	ID309	BGRC 43454	T. monococcum	monococcum	D	Germany
32	M	ID311	BGRC 43456	T. monococcum	monococcum	D	Germany
33	M	ID314	BGRC 43459	T. monococcum	monococcum	D	Switzerland
34	M	ID320	BGRC 43466	T. monococcum	monococcum	D	Albania
35	M	ID328	BGRC 43474	T. monococcum	monococcum	D	Balkan
36	M	ID351	BGRC 43497	T. monococcum	monococcum	D	Germany
37	M	ID353	BGRC 43499	T. monococcum	monococcum	D	Syria ?
38	M	ID396	2701	T. monococcum	monococcum	USA/ KS	Romania
39	M	ID432	19842	T. monococcum	monococcum	Austral.	Greece
40	M	ID433	19846	T. monococcum	monococcum	Austral.	Greece
41	M	ID435	19852	T. monococcum	monococcum conv. sinskajae	Austral.	Turkey
42	M	ID476	90451	T. monococcum	monococcum	Austral.	Bulgaria
43	M	ID492	PI 119423	T. monococcum	monococcum	USA/ ID	Turkey/ Westover H L 1277 Turkey/ Bursa/ field, 60 km southwest of Bursa/
44	M	ID493	PI 119435	T. monococcum	monococcum	USA/ ID	Turkey/ Westover H L 2592 Turkey/ Samsun/ field, 20 km west of Samsun/
45	M	ID495	PI 167589	T. monococcum	monococcum	USA/ ID	Turkey/ Harlan J R 3072 Turkey/ Canakkale/
46	M	ID496	PI 167591	T. monococcum	monococcum	USA/ ID	Turkey/ Harlan J R 3094 Turkey/ Canakkale/ Can/
47	M	ID497	PI 167611	T. monococcum	monococcum	USA/ ID	Turkey/ Harlan J R 3281 Turkey/ Balikesir/ seed store in Bandirma/
48	M	ID498	PI 167615	T. monococcum	monococcum	USA/ ID	Turkey/ Harlan J R 3304 Turkey/ Balikesir/ Okcugerli/
49	M	ID499	PI 167627	T. monococcum	monococcum	USA/ ID	Turkey/ Harlan J R 3412 Turkey/ Bursa/
50	M	ID500	PI 167634	T. monococcum	monococcum	USA/ ID	Turkey/ Harlan J R 3465 Turkey/ Bursa/ Apolyont/
51	M	ID505	PI 170196	T. monococcum	monococcum	USA/ ID	Türkei/ Harlan J R 2498 Turkey/ Kirklareli/ Babaeski, open pasture/
52	M	ID508	PI 190942	T. monococcum	monococcum	USA/ ID	Spain/ Zaragoza/
53	M	ID513	PI 221413	T. monococcum	monococcum	USA/ ID	Yugoslavia/ Serbia/
54	M	ID518	PI 265008	T. monococcum	monococcum	USA/ ID	Yugoslavia/ Bosnia Herzegovina/ Kavst Mountains, 2 km from Ljubuski/
55	M	ID519	PI 266844	T. monococcum	monococcum	USA/ ID	United Kingdom/ England/
56	M	ID533	PI 290508	T. monococcum	monococcum	USA/ ID	Hungary/
57	M	ID538	PI 306540	T. monococcum	monococcum	USA/ ID	Romania
58	M	ID544	PI 326317	T. monococcum	monococcum	USA/ ID	USSR/ Azerbaijan
59	M	ID572	PI 362616	T. monococcum	monococcum	USA/ ID	Yugoslavia/ Macedonia/ Skopska Tekija/
60	M	ID576	PI 393496	T. monococcum	monococcum	USA/ ID	Israel/ Einkorn Israel
61	M	ID584	PI 418582	T. monococcum	monococcum	USA/ ID	USSR/ Georgia
62	M	ID1138	PI 428158	T. monococcum	monococcum	USA/ ID	United Kingdom/ England/
63	M	ID1139	PI 428160	T. monococcum	monococcum	USA/ ID	Turkey/ Manisa/ Soma/
64	M	ID1140	PI 428166	T. monococcum	monococcum	USA/ ID	Turkey/ Bursa/ Gursu/
65	M	ID1259	PI 538721	T. monococcum	monococcum	USA/ ID	Turkey/ Canakkale/ Ecebat/
66	M	ID1260	PI 538722	T. monococcum	monococcum	USA/ ID	Turkey/ Tekirdag/ Malkara/
331	U	ID122	Htri 6735/83	T. urartu		DDR	Armenia
332	U	ID388	787	T. urartu		USA/ KS	Lebanon
333	U	ID393	831	T. urartu		USA/ KS	Iran
334	U	ID394	851	T. urartu		USA/ KS	USSR
335	U	ID1122	PI 428000	T. urartu		USA/ ID	Lebanon between Kfarkouk and Aiha/
336	U	ID1264	PI 554479	T. urartu		USA/ ID	Turkey, Gaziantep 19 km north of Gaziantep toward Yavuzeli
337	U	ID1277	PI 554498	T. urartu		USA/ ID	Turkey, Urfa 20 km west of Viransehir
338	U	ID1362	101001	T. urartu		UK	Armenia
339	U	ID1364	101004	T. urartu		UK	Turkey, 44.5 km W of Kizieltepe
340	U	ID1365	101005	T. urartu		UK	Lebanon
341	U	ID1366	101006	T. urartu		UK	Armenia
342	U	ID1391	WIR 33871	T. urartu		USSR	Armenia
343	U	ID1394	PI 428183	T. urartu		USDA	Armenia
344	U	ID1395	PI 428184	T. urartu		USDA	Turkey, Mardin
345	U	ID1396	PI 428185	T. urartu		USDA	Turkey, Mardin
346	U	ID1397	PI 428186	T. urartu		USDA	Turkey, Mardin
347	U	ID1398	PI 428187	T. urartu		USDA	Turkey, Mardin
348	U	ID1399	PI 428188	T. urartu		USDA	Turkey, Mardin
349	U	ID1400	PI 428189	T. urartu		USDA	Turkey, Mardin
350	U	ID1402	PI 428190	T. urartu		USDA	Turkey, Mardin
351	U	ID1403	PI 428191	T. urartu		USDA	Turkey, Mardin
352	U	ID1404	PI 428192	T. urartu		USDA	Turkey, Mardin
353	U	ID1405	PI 428193	T. urartu		USDA	Turkey, Mardin
354	U	ID1406	PI 428194	T. urartu		USDA	Turkey, Mardin
355	U	ID1407	PI 428195	T. urartu		USDA	Turkey, Mardin
356	U	ID1408	PI 428196	T. urartu		USDA	Turkey, Mardin
357	U	ID1409	PI 428197	T. urartu		USDA	Turkey, Mardin
358	U	ID1410	PI 428198	T. urartu		USDA	Turkey, Mardin
359	U	ID1411	PI 428202	T. urartu		USDA	Turkey, Mardin
360	U	ID1412	PI 428203	T. urartu		USDA	Turkey, Mardin
361	U	ID1413	PI 428204	T. urartu		USDA	Turkey, Mardin
362	U	ID1414	PI 428207	T. urartu		USDA	Turkey, Mardin
363	U	ID1415	PI 428208	T. urartu		USDA	Turkey, Mardin
364	U	ID1416	PI 428209	T. urartu		USDA	Turkey, Mardin
365	U	ID1417	PI 428210	T. urartu		USDA	Turkey, Mardin
366	U	ID1419	PI 428212	T. urartu		USDA	Turkey, Mardin
367	U	ID1420	PI 428213	T. urartu		USDA	Turkey, Mardin
368	U	ID1421	PI 428215	T. urartu		USDA	Turkey, Mardin
369	U	ID1422	PI 428216	T. urartu		USDA	Turkey, Mardin
370	U	ID1423	PI 428217	T. urartu		USDA	Turkey, Mardin
371	U	ID1424	PI 428218	T. urartu		USDA	Turkey, Mardin
372	U	ID1425	PI 428224	T. urartu		USDA	Turkey, Mardin
373	U	ID1426	PI 428225	T. urartu		USDA	Turkey, Mardin
374	U	ID1427	PI 428226	T. urartu		USDA	Turkey, Mardin
375	U	ID1428	PI 428228	T. urartu		USDA	Turkey, Mardin
376	U	ID1429	PI 428230	T. urartu		USDA	Turkey, Urfa
377	U	ID1430	PI 428231	T. urartu		USDA	Turkey, Urfa
378	U	ID1431	PI 428232	T. urartu		USDA	Turkey, Urfa
379	U	ID1432	PI 428233	T. urartu		USDA	Turkey, Urfa
380	U	ID1433	PI 428234	T. urartu		USDA	Turkey, Urfa
381	U	ID1435	PI 428236	T. urartu		USDA	Turkey, Urfa
382	U	ID1436	PI 428237	T. urartu		USDA	Turkey, Urfa
383	U	ID1437	PI 428238	T. urartu		USDA	Turkey, Urfa
384	U	ID1438	PI 428239	T. urartu		USDA	Turkey, Urfa
385	U	ID1439	PI 428240	T. urartu		USDA	Turkey, Urfa
386	U	ID1440	PI 428241	T. urartu		USDA	Turkey, Urfa
387	U	ID1441	PI 428242	T. urartu		USDA	Turkey, Urfa
388	U	ID1442	PI 428243	T. urartu		USDA	Turkey, Urfa
389	U	ID1443	PI 428244	T. urartu		USDA	Turkey, Urfa
390	U	ID1444	PI 428246	T. urartu		USDA	Turkey, Urfa
391	U	ID1445	PI 428247	T. urartu		USDA	Turkey, Urfa
392	U	ID1446	PI 428248	T. urartu		USDA	Turkey, Urfa
393	U	ID1447	PI 428249	T. urartu		USDA	Turkey, Urfa
394	U	ID1448	PI 428251	T. urartu		USDA	Turkey, Urfa
395	U	ID1449	PI 428254	T. urartu		USDA	Turkey, Mus
396	U	ID1450	PI 428255	T. urartu		USDA	Turkey, Mardin
397	U	ID1451	PI 428256	T. urartu		USDA	Turkey, Gaziantep
398	U	ID1452	PI 428261	T. urartu		USDA	Lebanon
399	U	ID1453	PI 428262	T. urartu		USDA	Lebanon
400	U	ID1454	PI 428263	T. urartu		USDA	Lebanon
401	U	ID1455	PI 428264	T. urartu		USDA	Lebanon
402	U	ID1456	PI 428265	T. urartu		USDA	Lebanon
403	U	ID1459	PI 428267	T. urartu		USDA	Lebanon
404	U	ID1460	PI 428268	T. urartu		USDA	Lebanon
405	U	ID1461	PI 428269	T. urartu		USDA	Lebanon
406	U	ID1462	PI 428270	T. urartu		USDA	Lebanon
407	U	ID1463	PI 428271	T. urartu		USDA	Lebanon
408	U	ID1464	PI 428272	T. urartu		USDA	Lebanon
409	U	ID1465	PI 428273	T. urartu		USDA	Lebanon
410	U	ID1466	PI 428274	T. urartu		USDA	Lebanon
411	U	ID1467	PI 428275	T. urartu		USDA	Lebanon
412	U	ID1468	PI 428276	T. urartu		USDA	Lebanon
413	U	ID1469	PI 428277	T. urartu		USDA	Lebanon
414	U	ID1470	PI 428278	T. urartu		USDA	Lebanon
415	U	ID1471	PI 428279	T. urartu		USDA	Lebanon
416	U	ID1472	PI 428280	T. urartu		USDA	Lebanon
417	U	ID1473	PI 428281	T. urartu		USDA	Lebanon
418	U	ID1474	PI 428282	T. urartu		USDA	Lebanon
419	U	ID1475	PI 428283	T. urartu		USDA	Lebanon
420	U	ID1476	PI 428284	T. urartu		USDA	Lebanon
421	U	ID1477	PI 428285	T. urartu		USDA	Lebanon
422	U	ID1478	PI 428286	T. urartu		USDA	Lebanon
423	U	ID1479	PI 428287	T. urartu		USDA	Lebanon
424	U	ID1480	PI 428288	T. urartu		USDA	Lebanon
425	U	ID1481	PI 428289	T. urartu		USDA	Lebanon
426	U	ID1482	PI 428290	T. urartu		USDA	Lebanon
427	U	ID1483	PI 428292	T. urartu		USDA	Lebanon
428	U	ID1484	PI 428294	T. urartu		USDA	Lebanon
429	U	ID1485	PI 428295	T. urartu		USDA	Lebanon
430	U	ID1486	PI 428297	T. urartu		USDA	Lebanon
431	U	ID1487	PI 428298	T. urartu		USDA	Lebanon
432	U	ID1488	PI 428299	T. urartu		USDA	Lebanon
433	U	ID1489	PI 428300	T. urartu		USDA	Lebanon
434	U	ID1490	PI 428301	T. urartu		USDA	Lebanon
435	U	ID1491	PI 428302	T. urartu		USDA	Lebanon
436	U	ID1492	PI 428303	T. urartu		USDA	Lebanon
437	U	ID1493	PI 428304	T. urartu		USDA	Lebanon
438	U	ID1494	PI 428305	T. urartu		USDA	Lebanon
439	U	ID1495	PI 428306	T. urartu		USDA	Lebanon
440	U	ID1496	PI 428307	T. urartu		USDA	Lebanon
441	U	ID1497	PI 428308	T. urartu		USDA	Lebanon
442	U	ID1500	PI 428312	T. urartu		USDA	Lebanon
443	U	ID1501	PI 428313	T. urartu		USDA	Lebanon
444	U	ID1502	PI 428314	T. urartu		USDA	Lebanon
445	U	ID1503	PI 428315	T. urartu		USDA	Lebanon
446	U	ID1504	PI 428317	T. urartu		USDA	Iran, Bakhtaran
447	U	ID1505	PI 428319	T. urartu		USDA	Lebanon
448	U	ID1506	PI 428320	T. urartu		USDA	Lebanon
449	U	ID1507	PI 428321	T. urartu		USDA	Lebanon
450	U	ID1508	PI 428322	T. urartu		USDA	Lebanon
451	U	ID1509	PI 428323	T. urartu		USDA	Lebanon
452	U	ID1510	PI 428324	T. urartu		USDA	Lebanon
453	U	ID1511	PI 428326	T. urartu		USDA	Lebanon
454	U	ID1512	PI 428327	T. urartu		USDA	Lebanon
455	U	ID1513	PI 428328	T. urartu		USDA	Lebanon
456	U	ID1514	PI 428329	T. urartu		USDA	Lebanon
457	U	ID1515	PI 428330	T. urartu		USDA	Lebanon
458	U	ID1516	PI 428331	T. urartu		USDA	Lebanon
459	U	ID1517	PI 428332	T. urartu		USDA	Lebanon
460	U	ID1518	PI 428333	T. urartu		USDA	Lebanon
461	U	ID1519	PI 428334	T. urartu		USDA	Lebanon
462	U	ID1520	PI 428335	T. urartu		USDA	Lebanon
463	U	ID1521	PI 428336	T. urartu		USDA	Lebanon
464	U	ID1522	PI 428337	T. urartu		USDA	Lebanon
465	U	ID1523	PI 428338	T. urartu		USDA	Lebanon
466	U	ID1525	PI 428340	T. urartu		USDA	Lebanon
467	U	ID1526	PI 428341	T. urartu		USDA	Lebanon
468	U	ID1527	PI 503318	T. urartu		USDA	Turkey, Mardin
469	U	ID1529	PI 538724	T. urartu		USDA	Turkey, Mardin
470	U	ID1530	PI 538725	T. urartu		USDA	Turkey, Mardin
471	U	ID1531	PI 538726	T. urartu		USDA	Turkey, Mardin
472	U	ID1532	PI 538727	T. urartu		USDA	Turkey, Mardin
473	U	ID1533	PI 538728	T. urartu		USDA	Turkey, Urfa
474	U	ID1534	PI 538729	T. urartu		USDA	Turkey, Urfa
475	U	ID1535	PI 538730	T. urartu		USDA	Turkey, Urfa
476	U	ID1536	PI 538731	T. urartu		USDA	Turkey, Urfa
477	U	ID1537	PI 538732	T. urartu		USDA	Turkey, Urfa
478	U	ID1538	PI 538733	T. urartu		USDA	Turkey, Urfa
479	U	ID1539	PI 538734	T. urartu		USDA	Lebanon
480	U	ID1540	PI 538735	T. urartu		USDA	Lebanon
481	U	ID1541	PI 538736	T. urartu		USDA	Lebanon
482	U	ID1542	PI 538737	T. urartu		USDA	Lebanon
483	U	ID1543	PI 538738	T. urartu		USDA	Lebanon
484	U	ID1544	PI 538739	T. urartu		USDA	Lebanon
485	U	ID1545	PI 538740	T. urartu		USDA	Lebanon
486	U	ID1546	PI 538741	T. urartu		USDA	Lebanon
487	U	ID1547	PI 538742	T. urartu		USDA	Lebanon
488	U	ID1548	PI 538743	T. urartu		USDA	Lebanon
489	U	ID1549	PI 538744	T. urartu		USDA	Lebanon
490	U	ID1550	PI 538745	T. urartu		USDA	Lebanon
491	U	ID1551	PI 538746	T. urartu		USDA	Lebanon
492	U	ID1552	PI 538747	T. urartu		USDA	Lebanon
493	U	ID1553	PI 538748	T. urartu		USDA	Lebanon
494	U	ID1554	PI 538749	T. urartu		USDA	Lebanon
495	U	ID1555	PI 538750	T. urartu		USDA	Lebanon
496	U	ID1556	PI 538751	T. urartu		USDA	Lebanon
B	Triticum monococcum subsp. boeoticum
M	Triticum monococcum subsp. monococcum
U	Triticum urartu
ae	Triticum monococcum subsp. aegilopoides
Bk	Triticum monococcum subsp. boeoticum from Karakadag
	2 S4				A. Fricano et al.
